# Supplementary material for: Protection-Free Strategy for the Synthesis of Boro-Depsipeptides in Aqueous Media under Microwave-Assisted Conditions
Source: MDPI journal article supplement (doi:10.3390/molecules27072325), 2022-04-04
Supplement: s1 [file s1]

## **Protection-free Strategy for the Synthesis of Boro-depsipeptides in Aqueous Media under Microwave-assisted Conditions**

**Shuo-Bei Qiu <sup>1</sup>, Pei-Yao Liu <sup>2</sup>, Bo-Cheng Wang <sup>3</sup>, Pin-Rui Chen <sup>3</sup>, Jing-Han Xiao <sup>3</sup>, Ting-Yu Hsu <sup>3</sup>, Kuan-Lin Pan <sup>3</sup>, Zhi-Yin Lai <sup>3</sup>, Yi-Wei Chen <sup>4</sup>, Ying-Chuan Chen <sup>2,\*</sup>, Jen-Kun Chen <sup>1,5,\*</sup> and Po-Shen Pan <sup>3,\*</sup>**

<sup>1</sup> Graduate Institute of Life Sciences, National Defense Medical Center, No.161, Sec. 6, Minquan E. Rd., Neihu Dist., Taipei City 11490, Taiwan, Republic of China; gloria919147@gmail.com

<sup>2</sup> Department of Physiology & Biophysics, National Defense Medical Center, No.161, Sec. 6, Minquan E. Rd., Neihu Dist., Taipei City 11490, Taiwan, Republic of China; peiyaol01@gmail.com

<sup>3</sup> Department of Chemistry, College of Sciences, Tamkang University, No. 151, Yingzhuan Rd., Danshui Dist., New Taipei City 25137, Taiwan, Republic of China; bcw@mail.tku.edu.tw (B.-C.W.); shawn19991002@gmail.com (P.-R.C.); a0952389829@gmail.com (J.-H.X.); lydia1020552@gmail.com (T.-Y.H.); ss870119@gmail.com (K.-L.P.); aa0935900324@gmail.com (Z.-Y.L.)

<sup>4</sup> Department of Oncology, Taipei Veterans General Hospital, No. 201, Sec. 2, Shipai Rd., Beitou District, Taipei City, Taiwan 11217, Republic of China; chenyw@vghtpe.gov.tw

<sup>5</sup> Center for Nanomedicine Research, National Health Research Institutes, Zhunan, Miaoli County 35053, Taiwan, Republic of China

\* Correspondence: addy0918@gmail.com (Y.-C.C.); jkchen@nhri.edu.tw (J.-K.C.); 138020@gms.tku.edu.tw (P.-S.P.)

### **Table of Content**

**Figure S1.** The <sup>1</sup>H NMR spectrum of **4a** in CD<sub>3</sub>OD

**Figure S2.** The <sup>13</sup>C NMR spectrum of **4a** in CD<sub>3</sub>OD

**Figure S3.** The <sup>11</sup>B NMR spectrum of **4a** in CD<sub>3</sub>OD

**Figure S4.** The HRMS (ESI<sup>+</sup>) of spectrum of **4a**

**Figure S5.** The <sup>1</sup>H NMR spectrum of **4b** in CD<sub>3</sub>OD

**Figure S6.** The <sup>13</sup>C NMR spectrum of **4b** in CD<sub>3</sub>OD

**Figure S7.** The <sup>11</sup>B NMR spectrum of **4b** in CD<sub>3</sub>OD

**Figure S8.** The HRMS (ESI<sup>+</sup>) of spectrum of **4b**

**Figure S9.** The <sup>1</sup>H NMR spectrum of **4c** in CD<sub>3</sub>OD

**Figure S10.** The <sup>13</sup>C NMR spectrum of **4c** in CD<sub>3</sub>OD

**Figure S11.** The <sup>11</sup>B NMR spectrum of **4c** in CD<sub>3</sub>OD

**Figure S12.** The HRMS (ESI<sup>+</sup>) of spectrum of **4c**

**Figure S13.** The <sup>1</sup>H NMR spectrum of **4d** in CD<sub>3</sub>OD

**Figure S14.** The <sup>13</sup>C NMR spectrum of **4d** in CD<sub>3</sub>OD

**Figure S15.** The <sup>11</sup>B NMR spectrum of **4d** in CD<sub>3</sub>OD

**Figure S16.** The HRMS (ESI<sup>+</sup>) of spectrum of **4d**

**Figure S17.** The <sup>1</sup>H NMR spectrum of **4e** in CD<sub>3</sub>OD

**Figure S18.** The <sup>13</sup>C NMR spectrum of **4e** in CD<sub>3</sub>OD

**Figure S19.** The  $^{11}\text{B}$  NMR spectrum of **4e** in  $\text{CD}_3\text{OD}$

**Figure S20.** The HRMS ( $\text{ESI}^+$ ) of spectrum of **4e**

**Figure S21.** The  $^1\text{H}$  NMR spectrum of **4f** in  $\text{CD}_3\text{OD}$

**Figure S22.** The  $^{13}\text{C}$  NMR spectrum of **4f** in  $\text{CD}_3\text{OD}$

**Figure S23.** The  $^{11}\text{B}$  NMR spectrum of **4f** in  $\text{CD}_3\text{OD}$

**Figure S24.** The HRMS ( $\text{ESI}^+$ ) of spectrum of **4f**

**Figure S25.** The  $^1\text{H}$  NMR spectrum of **4g** in  $\text{CD}_3\text{OD}$

**Figure S26.** The  $^{13}\text{C}$  NMR spectrum of **4g** in  $\text{CD}_3\text{OD}$

**Figure S27.** The  $^{11}\text{B}$  NMR spectrum of **4g** in  $\text{CD}_3\text{OD}$

**Figure S28.** The HRMS ( $\text{ESI}^+$ ) of spectrum of **4g**

**Figure S29.** The  $^1\text{H}$  NMR spectrum of **5a** in  $\text{CD}_3\text{OD}$

**Figure S30.** The  $^{13}\text{C}$  NMR spectrum of **5a** in  $\text{CD}_3\text{OD}$

**Figure S31.** The  $^{11}\text{B}$  NMR spectrum of **5a** in  $\text{CD}_3\text{OD}$

**Figure S32.** The HRMS ( $\text{ESI}^+$ ) of spectrum of **5a**

**Figure S33.** The  $^1\text{H}$  NMR spectrum of **5b** in  $\text{CD}_3\text{OD}$

**Figure S34.** The  $^{13}\text{C}$  NMR spectrum of **5b** in  $\text{CD}_3\text{OD}$

**Figure S35.** The  $^{11}\text{B}$  NMR spectrum of **5b** in  $\text{CD}_3\text{OD}$

**Figure S36.** The HRMS ( $\text{ESI}^+$ ) of spectrum of **5b**

**Figure S37.** The  $^1\text{H}$  NMR spectrum of **5c** in  $\text{CD}_3\text{OD}$

**Figure S38.** The  $^{13}\text{C}$  NMR spectrum of **5c** in  $\text{CD}_3\text{OD}$

**Figure S39.** The  $^{11}\text{B}$  NMR spectrum of **5c** in  $\text{CD}_3\text{OD}$

**Figure S40.** The HRMS ( $\text{ESI}^+$ ) of spectrum of **5c**

**Figure S41.** The  $^1\text{H}$  NMR spectrum of **5d** in  $\text{CD}_3\text{OD}$

**Figure S42.** The  $^{13}\text{C}$  NMR spectrum of **5d** in  $\text{CD}_3\text{OD}$

**Figure S43.** The  $^{11}\text{B}$  NMR spectrum of **5d** in  $\text{CD}_3\text{OD}$

**Figure S44.** The HRMS ( $\text{ESI}^+$ ) of spectrum of **5d**

**Figure S45.** The  $^1\text{H}$  NMR spectrum of **5e** in  $\text{CD}_3\text{OD}$

**Figure S46.** The  $^{13}\text{C}$  NMR spectrum of **5e** in  $\text{CD}_3\text{OD}$

**Figure S47.** The  $^{11}\text{B}$  NMR spectrum of **5e** in  $\text{CD}_3\text{OD}$

**Figure S48.** The HRMS ( $\text{ESI}^+$ ) of spectrum of **5e**

**Figure S49.** The  $^1\text{H}$  NMR spectrum of **5f** in  $\text{CD}_3\text{OD}$

**Figure S50.** The  $^{13}\text{C}$  NMR spectrum of **5f** in  $\text{CDCl}_3$

**Figure S51.** The  $^{11}\text{B}$  NMR spectrum of **5f** in  $\text{CD}_3\text{OD}$

**Figure S52.** The HRMS ( $\text{ESI}^+$ ) of spectrum of **5f**

**Figure S53.** The  $^1\text{H}$  NMR spectrum of **5g** in  $\text{CD}_3\text{OD}$

**Figure S54.** The  $^{13}\text{C}$  NMR spectrum of **5g** in  $\text{CD}_3\text{OD}$

**Figure S55.** The  $^{11}\text{B}$  NMR spectrum of **5g** in  $\text{CD}_3\text{OD}$

**Figure S56.** The HRMS ( $\text{ESI}^+$ ) of spectrum of **5g**

**Figure S57.** The  $^1\text{H}$  NMR spectrum of **5h** in  $\text{CD}_3\text{OD}$

**Figure S58.** The  $^{13}\text{C}$  NMR spectrum of **5h** in  $\text{CD}_3\text{OD}$

**Figure S59.** The  $^{11}\text{B}$  NMR spectrum of **5h** in  $\text{CD}_3\text{OD}$

**Figure S60.** The HRMS ( $\text{ESI}^+$ ) of spectrum of **5h**

**Figure S61.** The  $^1\text{H}$  NMR spectrum of **5i** in  $\text{CD}_3\text{OD}$

**Figure S62.** The  $^{13}\text{C}$  NMR spectrum of **5i** in  $\text{CD}_3\text{OD}$

**Figure S63.** The  $^{11}\text{B}$  NMR spectrum of **5i** in  $\text{CD}_3\text{OD}$

**Figure S64.** The HRMS ( $\text{ESI}^+$ ) of spectrum of **5i**

**Figure S65.** The  $^1\text{H}$  NMR spectrum of **5j** in  $\text{CD}_3\text{OD}$

**Figure S66.** The  $^{13}\text{C}$  NMR spectrum of **5j** in  $\text{CD}_3\text{OD}$

**Figure S67.** The  $^{11}\text{B}$  NMR spectrum of **5j** in  $\text{CD}_3\text{OD}$

**Figure S68.** The HRMS ( $\text{ESI}^+$ ) of spectrum of **5j**

**Figure S69.** The  $^1\text{H}$  NMR spectrum of **5k** in  $\text{CD}_3\text{OD}$

**Figure S70.** The  $^{13}\text{C}$  NMR spectrum of **5k** in  $\text{CD}_3\text{OD}$

**Figure S71.** The  $^{11}\text{B}$  NMR spectrum of **5k** in  $\text{CD}_3\text{OD}$

**Figure S72.** The HRMS ( $\text{ESI}^-$ ) of spectrum of **5k**

**Figure S73.** The  $^1\text{H}$  NMR spectrum of **5l** in  $\text{CD}_3\text{OD}$

**Figure S74.** The  $^{13}\text{C}$  NMR spectrum of **5l** in  $\text{CD}_3\text{OD}$

**Figure S75.** The HRMS ( $\text{ESI}^+$ ) of spectrum of **5l**

**Figure S76.** The cytotoxicity of the compounds **4a-4d**, **4f** and **4g** in HEK-293 cells.

**Figure S77.** The cytotoxicity of the compounds **5b-5g**, **5j** and **5k** in HEK-293 cells.

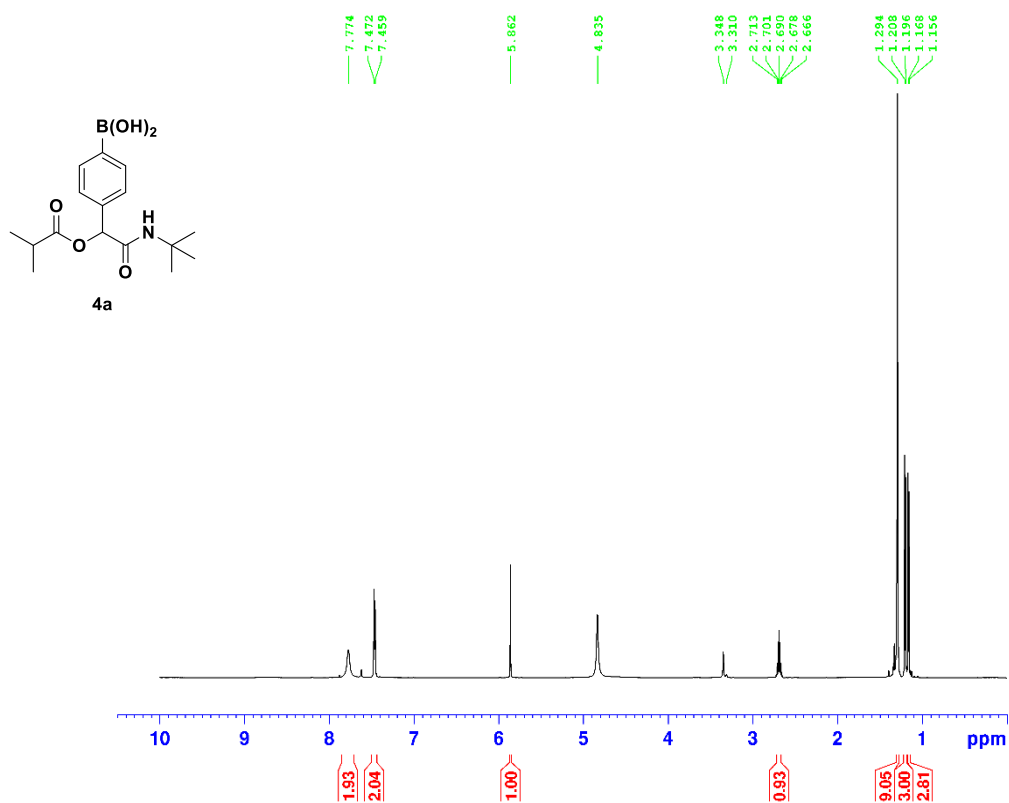

Figure S1. The  $^1\text{H}$  NMR spectrum of **4a** in  $\text{CD}_3\text{OD}$

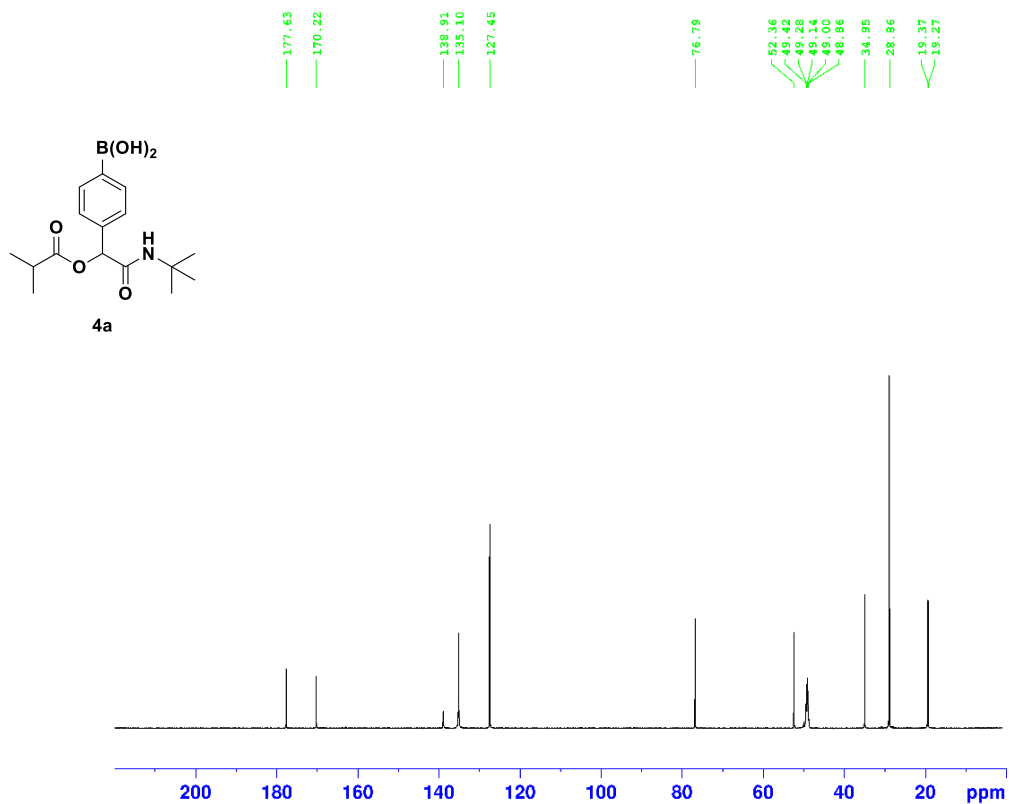

Figure S2. The  $^{13}\text{C}$  NMR spectrum of **4a** in  $\text{CD}_3\text{OD}$

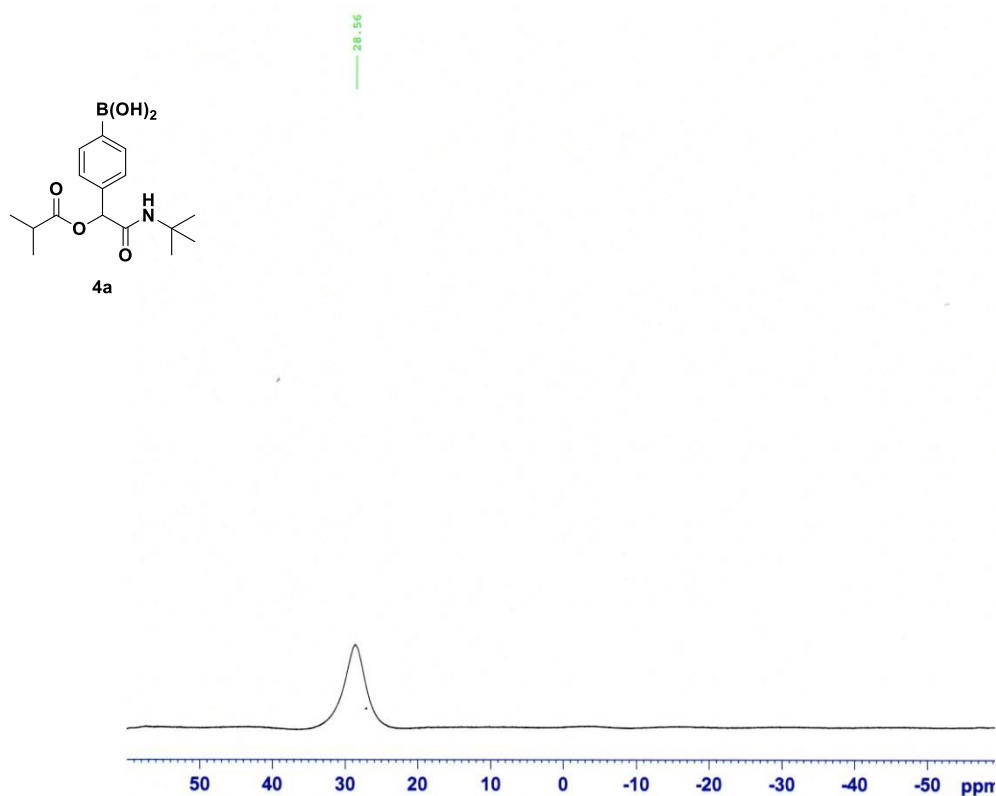

**Figure S3.** The <sup>11</sup>B NMR spectrum of **4a** in CD<sub>3</sub>OD

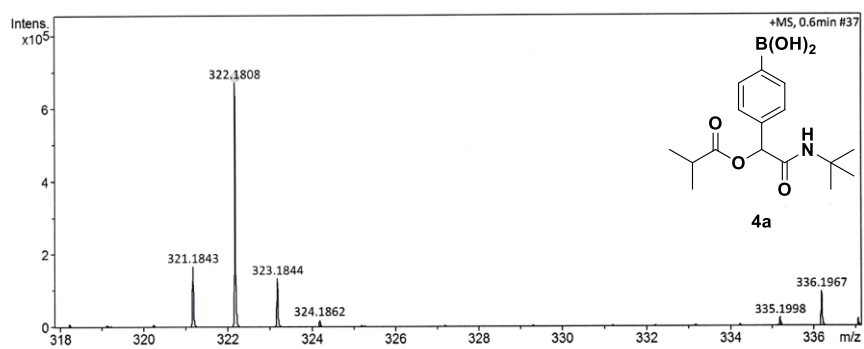

**Figure S4.** The HRMS (ESI<sup>+</sup>) of spectrum of **4a**

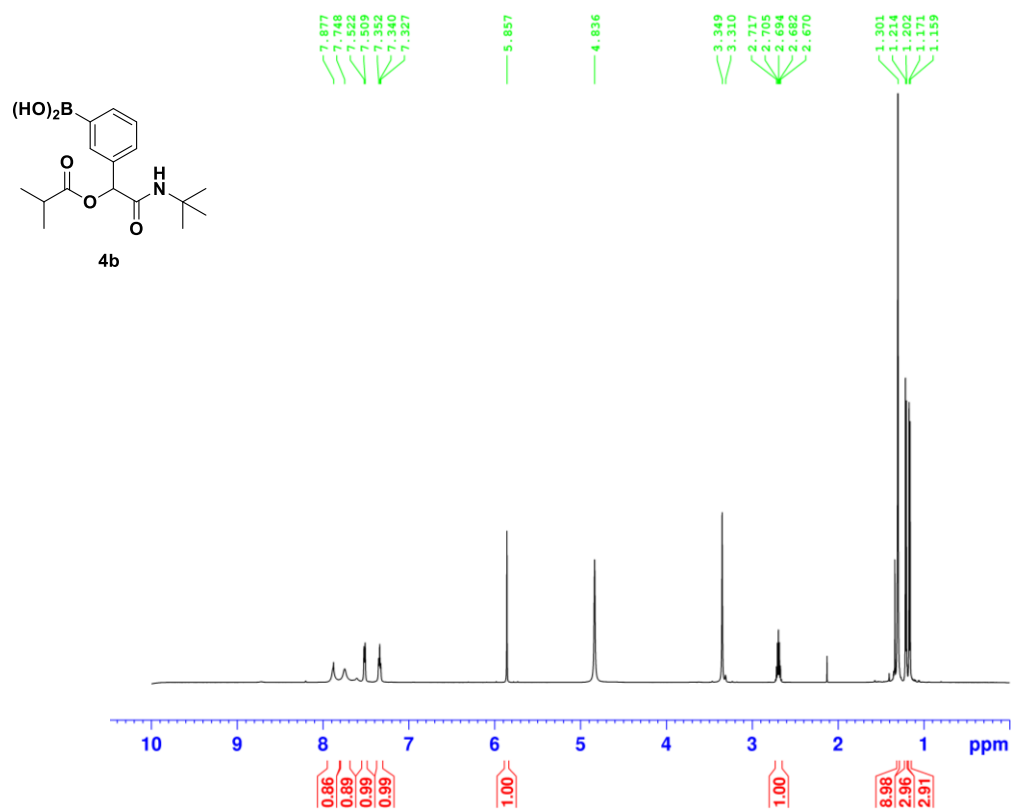

Figure S5. The  $^1\text{H}$  NMR spectrum of **4b** in  $\text{CD}_3\text{OD}$

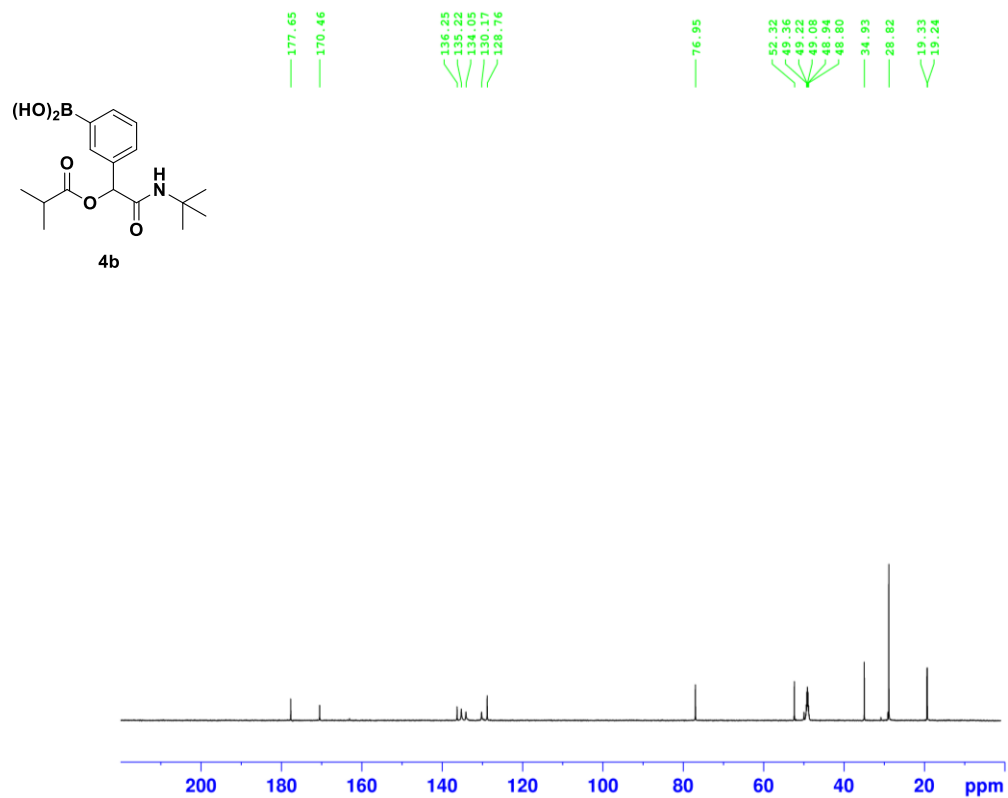

Figure S6. The  $^{13}\text{C}$  NMR spectrum of **4b** in  $\text{CD}_3\text{OD}$

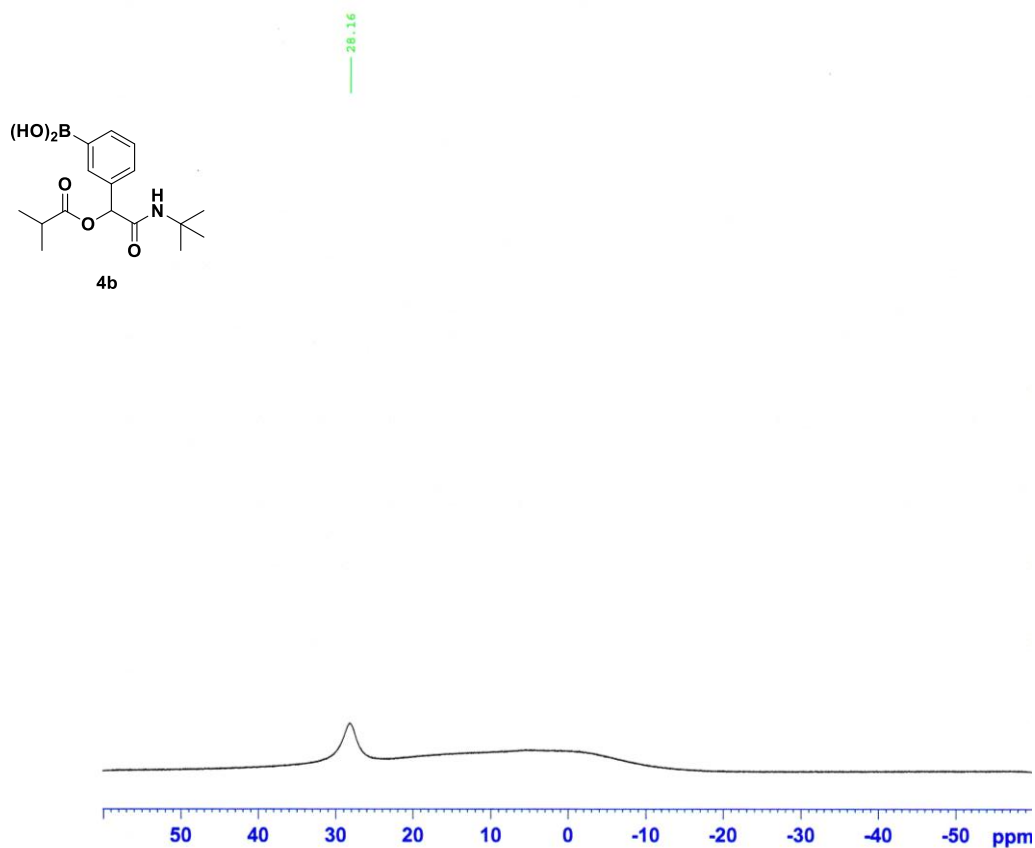

Figure S7. The  $^{11}\text{B}$  NMR spectrum of **4b** in  $\text{CD}_3\text{OD}$

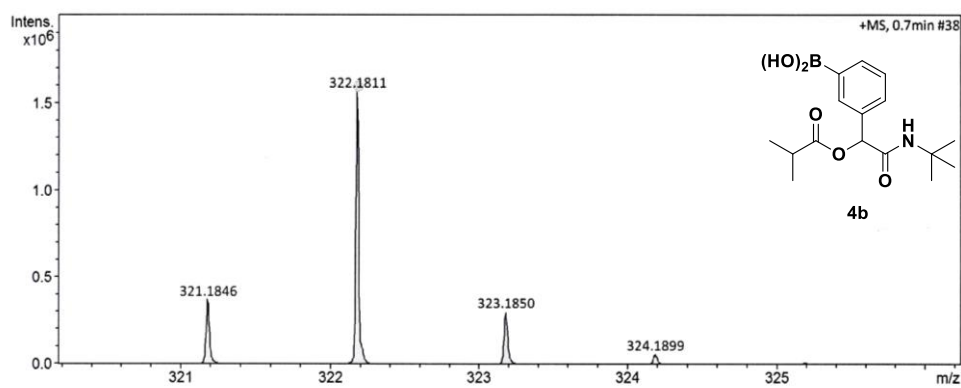

Figure S8. The HRMS (ESI $^+$ ) of spectrum of **4b**

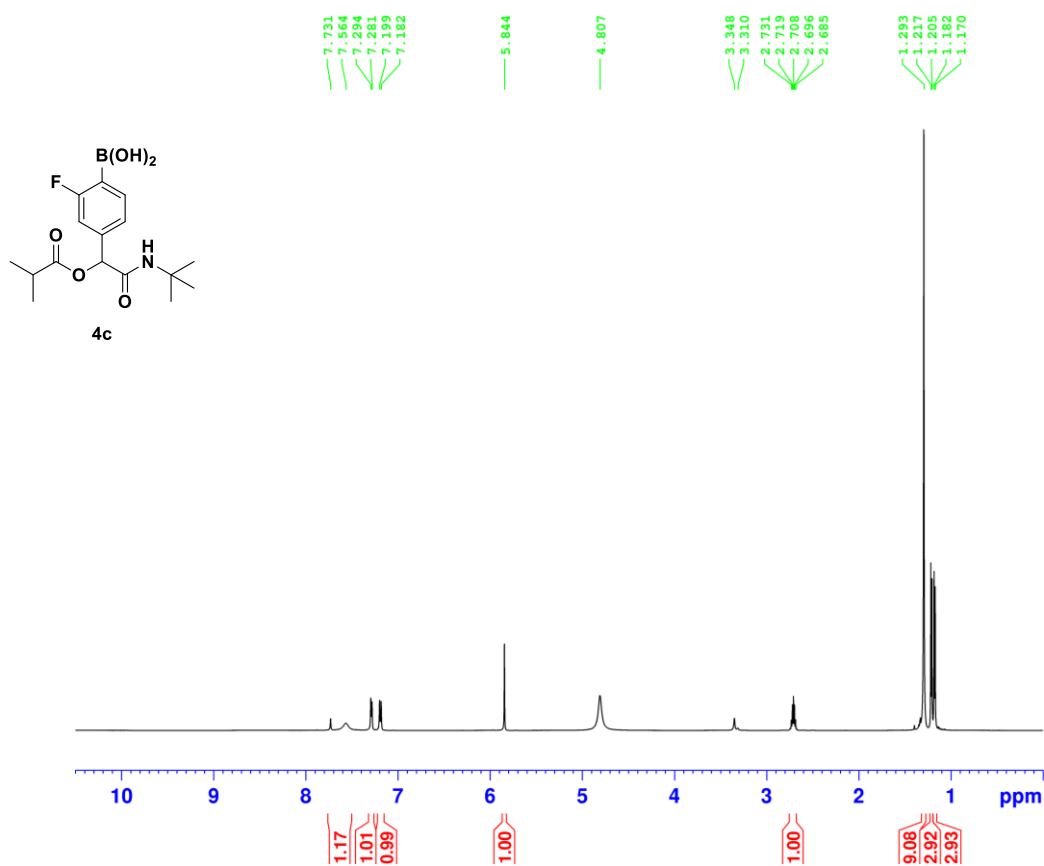

Figure S9. The  $^1\text{H}$  NMR spectrum of **4c** in  $\text{CD}_3\text{OD}$

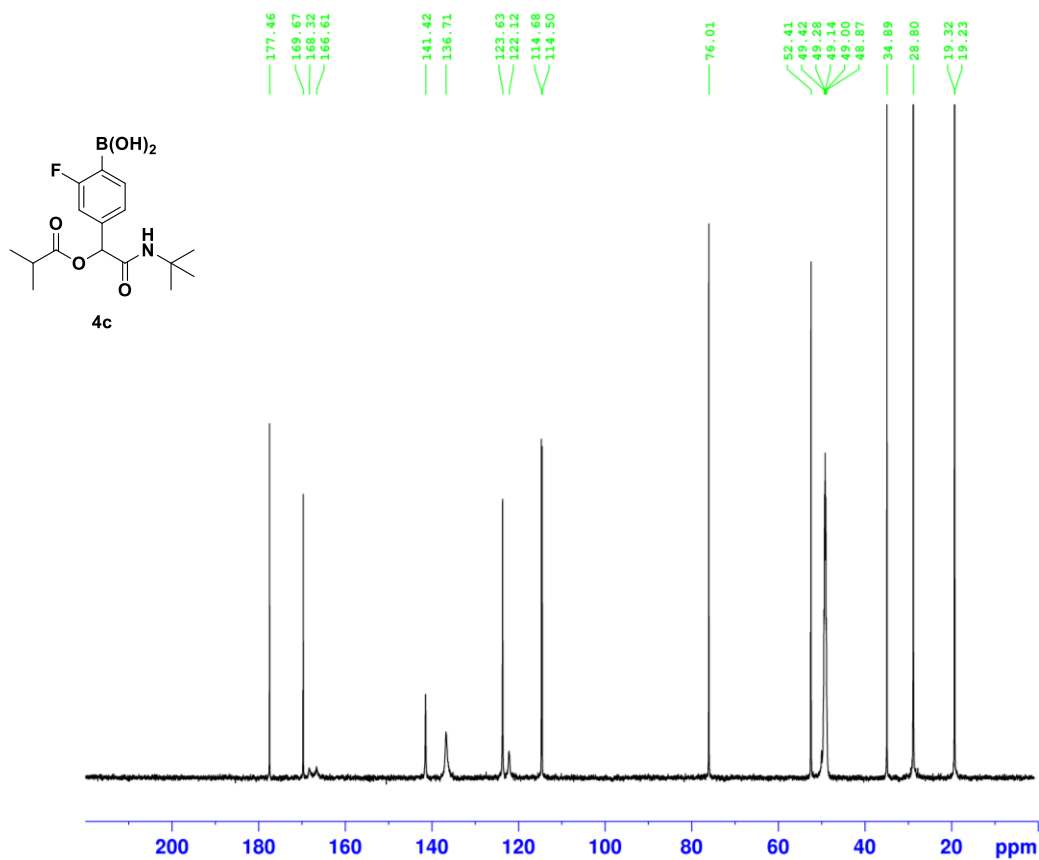

Figure S10. The  $^{13}\text{C}$  NMR spectrum of **4c** in  $\text{CD}_3\text{OD}$



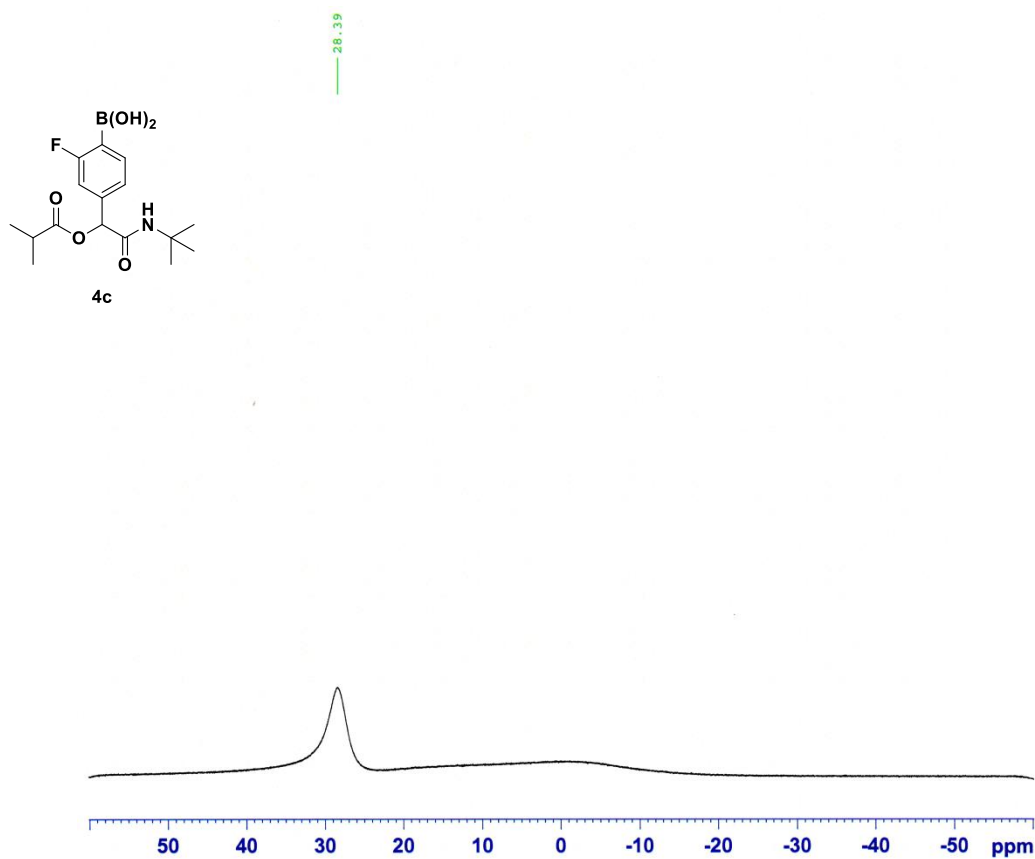

**Figure S11.** The  $^{11}\text{B}$  NMR spectrum of **4c** in  $\text{CD}_3\text{OD}$

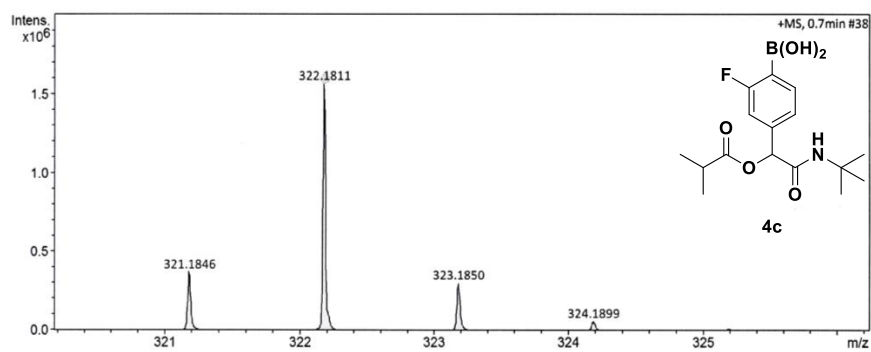

**Figure S12.** The HRMS (ESI $^+$ ) of spectrum of **4c**

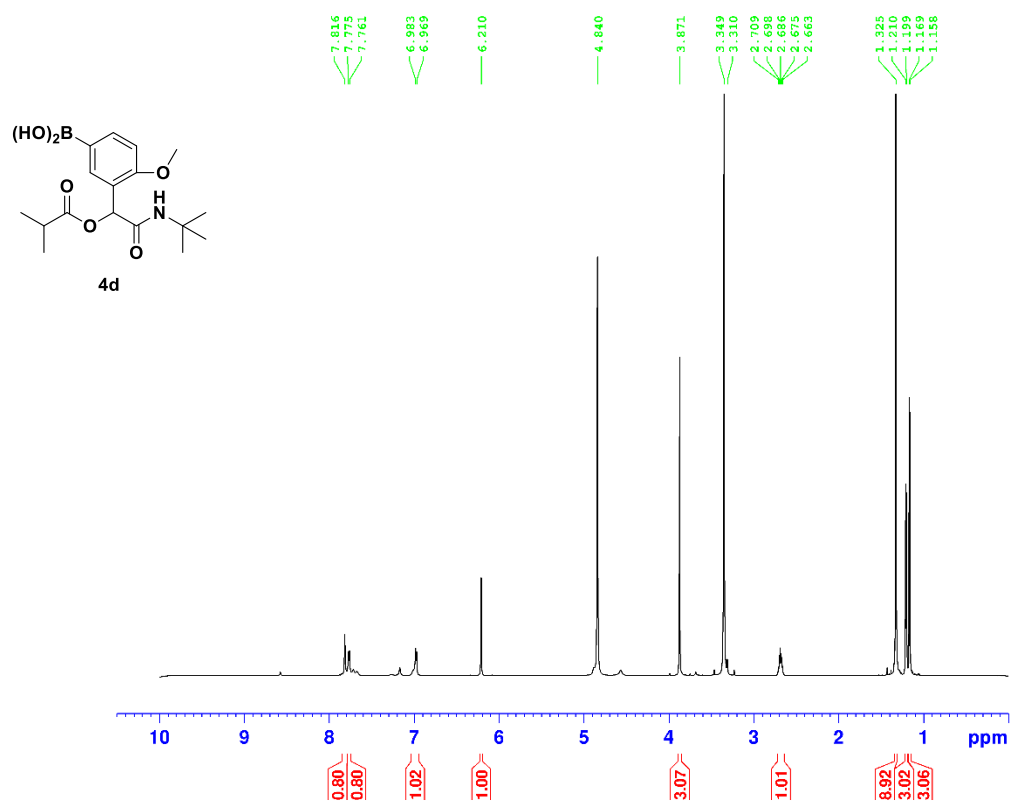

Figure S13. The  $^1\text{H}$  NMR spectrum of **4d** in  $\text{CD}_3\text{OD}$

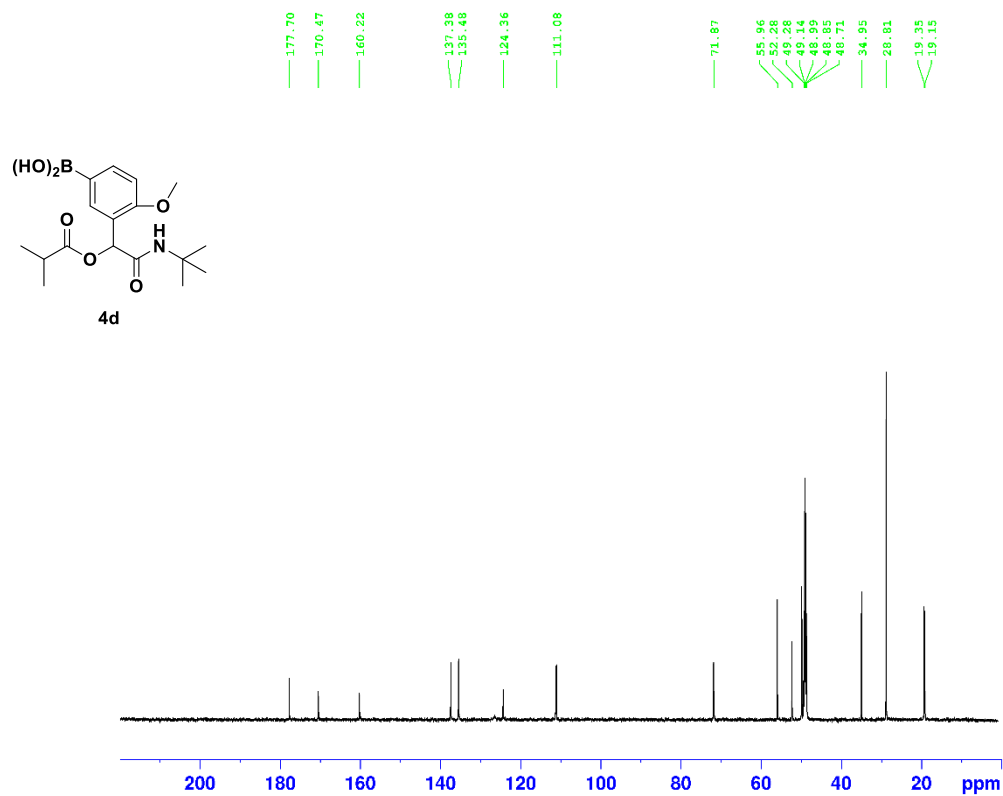

Figure S14. The  $^{13}\text{C}$  NMR spectrum of **4d** in  $\text{CD}_3\text{OD}$

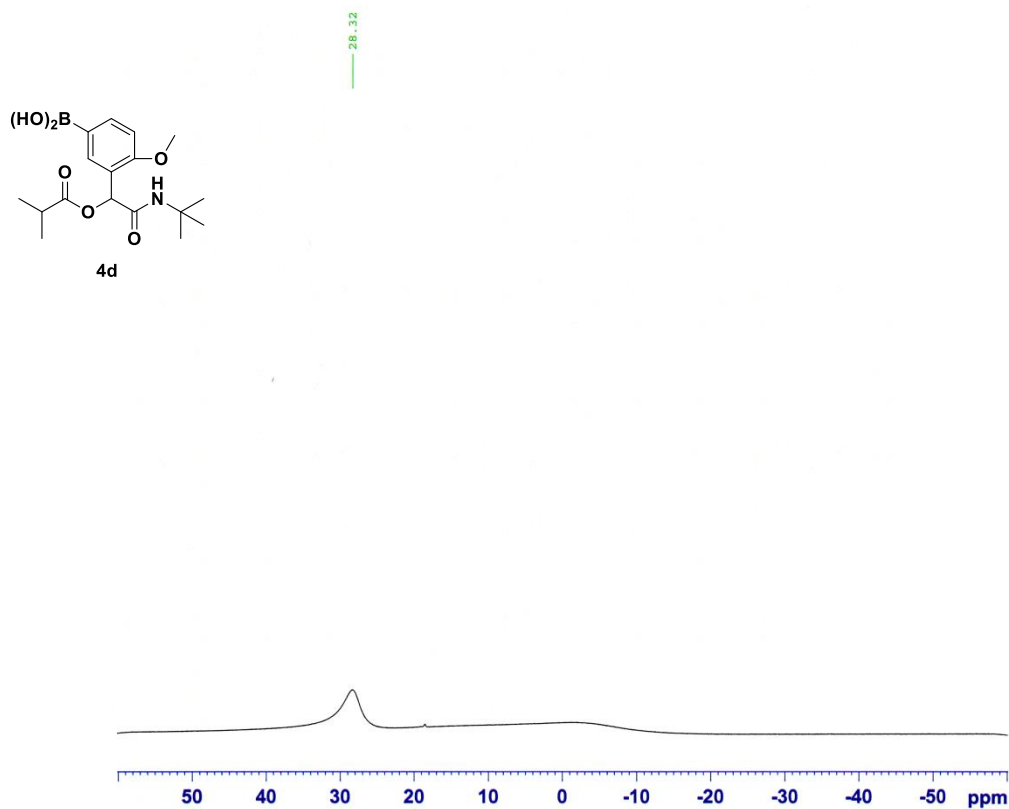

Figure S15. The  $^{11}\text{B}$  NMR spectrum of **4d** in  $\text{CD}_3\text{OD}$

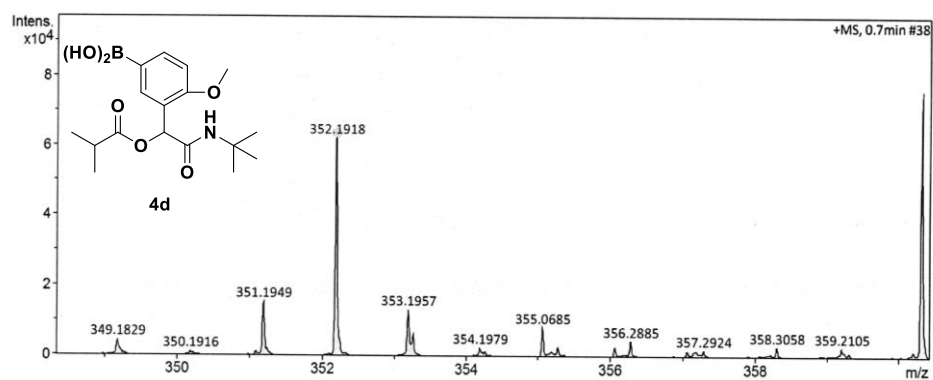

Figure S16. The HRMS (ESI $^+$ ) of spectrum of **4d**

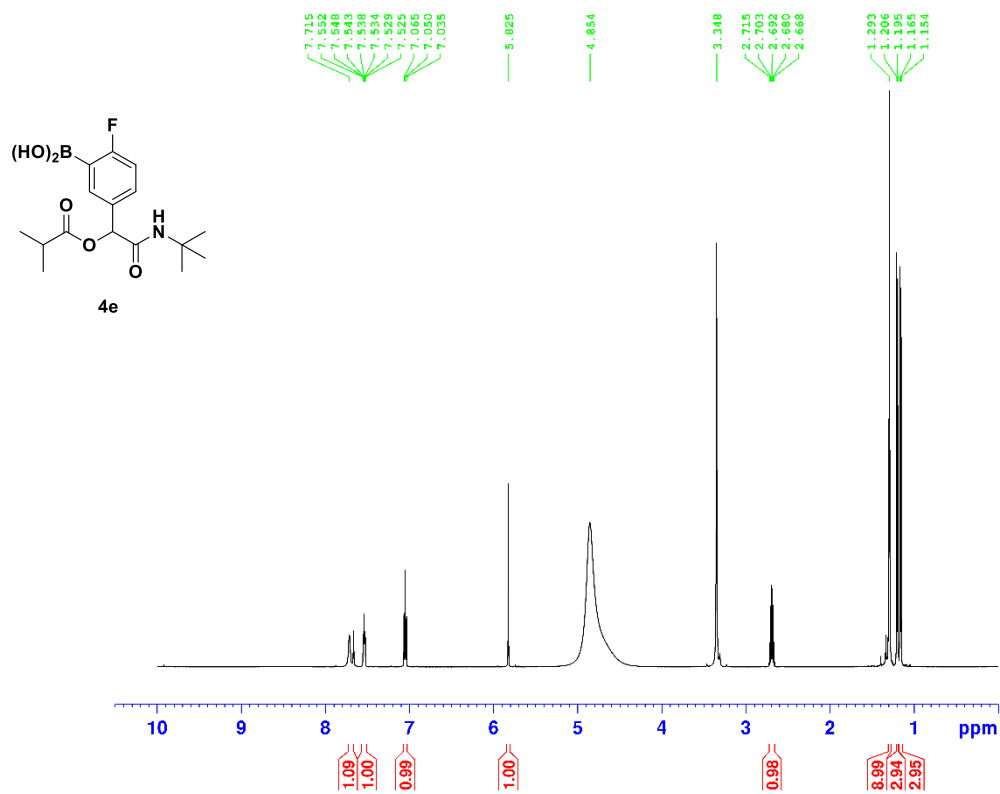

Figure S17. The  $^1\text{H}$  NMR spectrum of **4e** in  $\text{CD}_3\text{OD}$

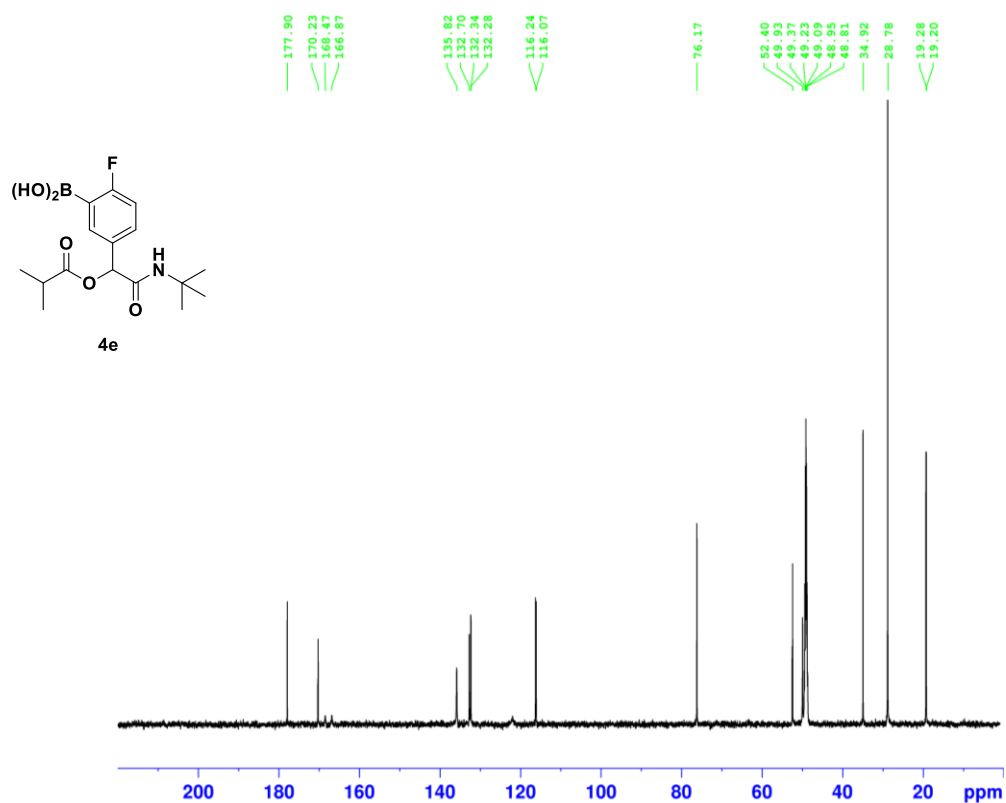

Figure S18. The  $^{13}\text{C}$  NMR spectrum of **4e** in  $\text{CD}_3\text{OD}$

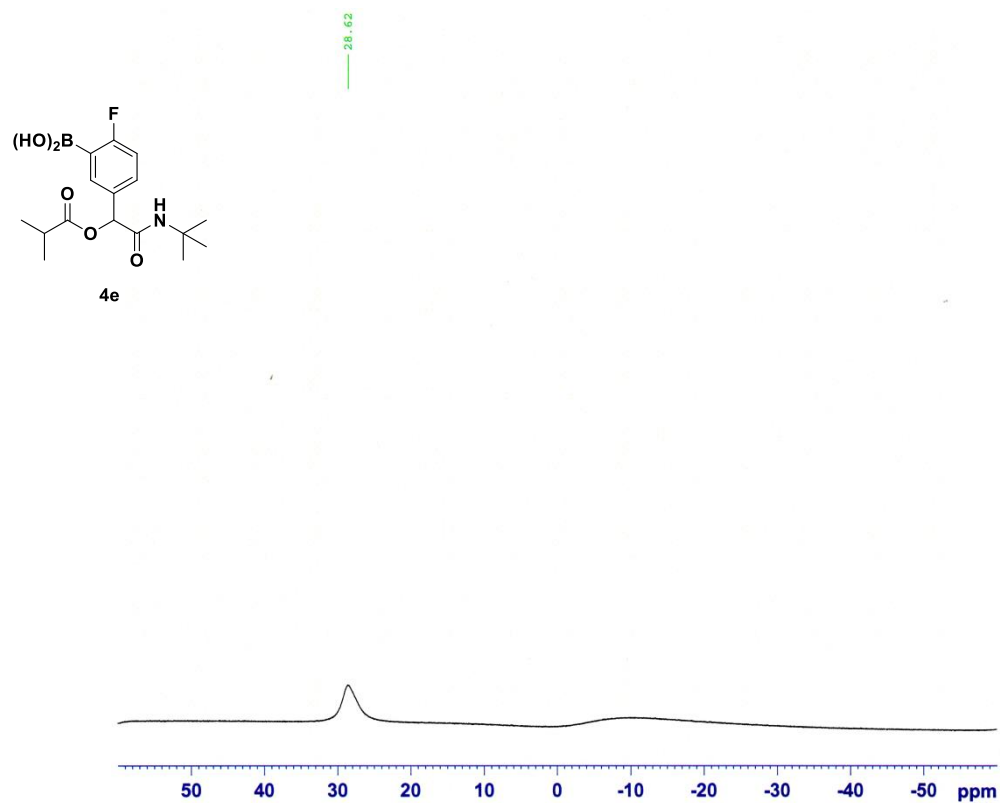

**Figure S19.** The  $^{11}\text{B}$  NMR spectrum of **4e** in  $\text{CD}_3\text{OD}$

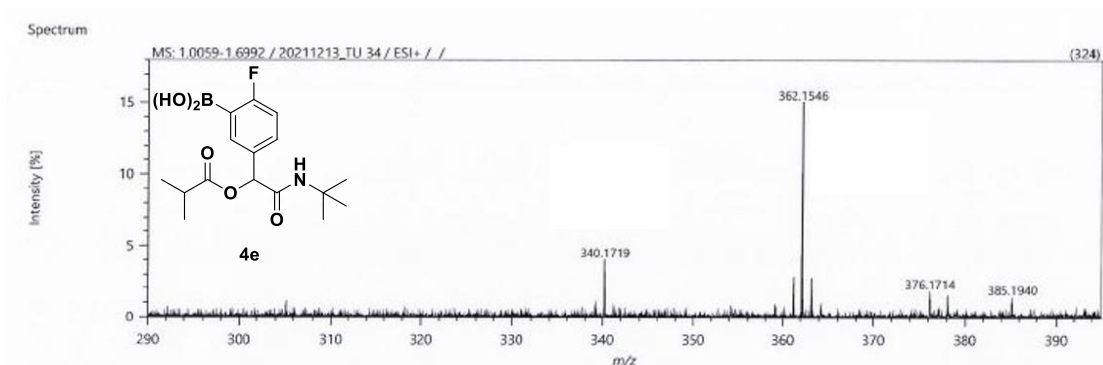

**Figure S20.** The HRMS (ESI $^+$ ) of spectrum of **4e**

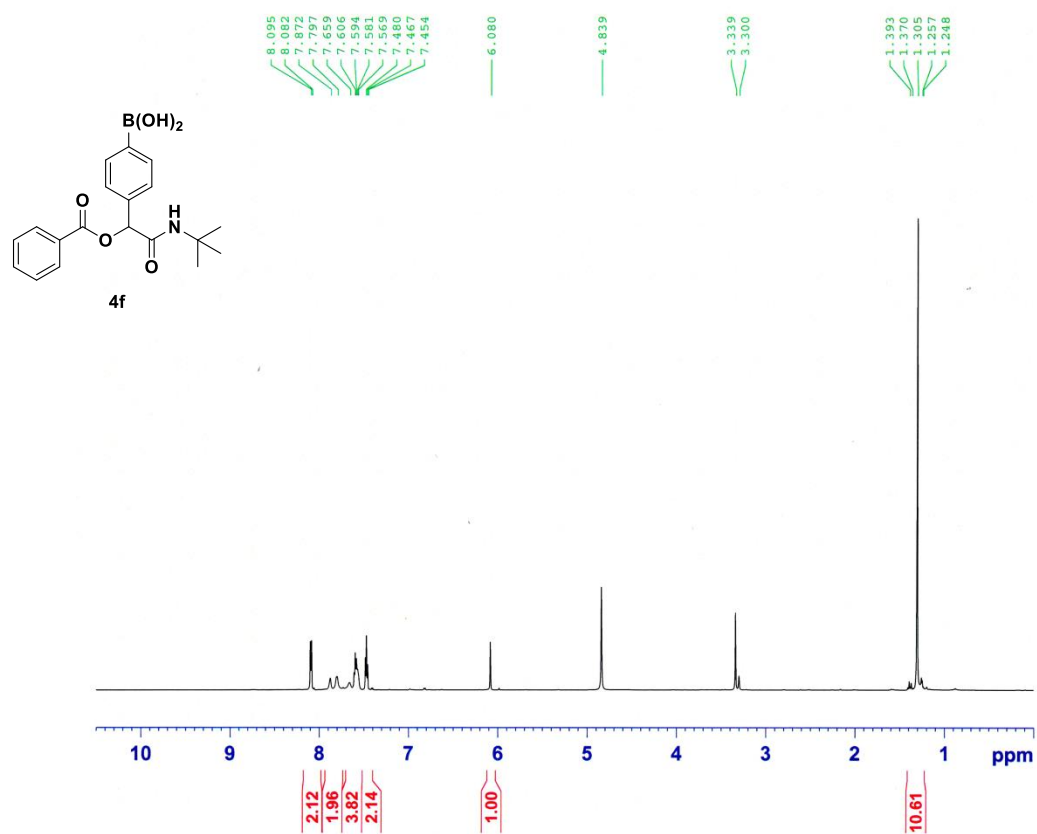

Figure S21. The  $^1\text{H}$  NMR spectrum of **4f** in  $\text{CD}_3\text{OD}$

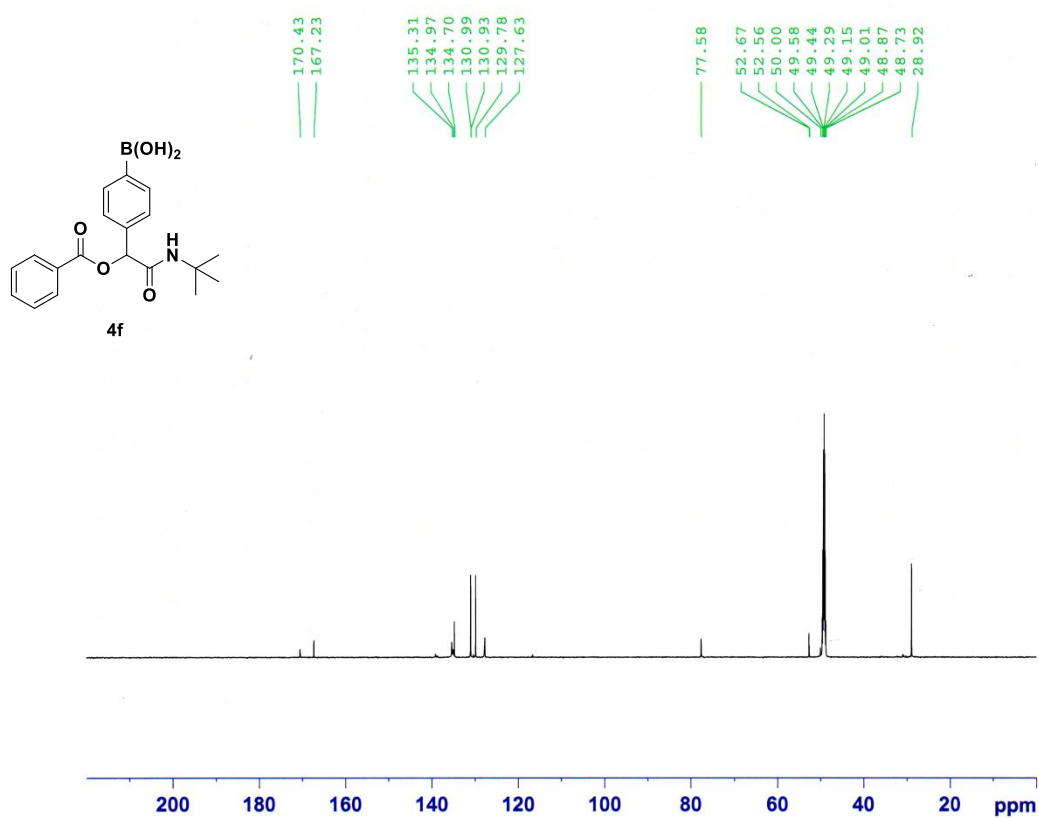

Figure S22. The  $^{13}\text{C}$  NMR spectrum of **4f** in  $\text{CD}_3\text{OD}$

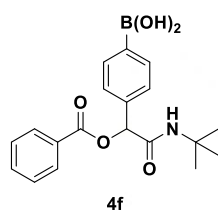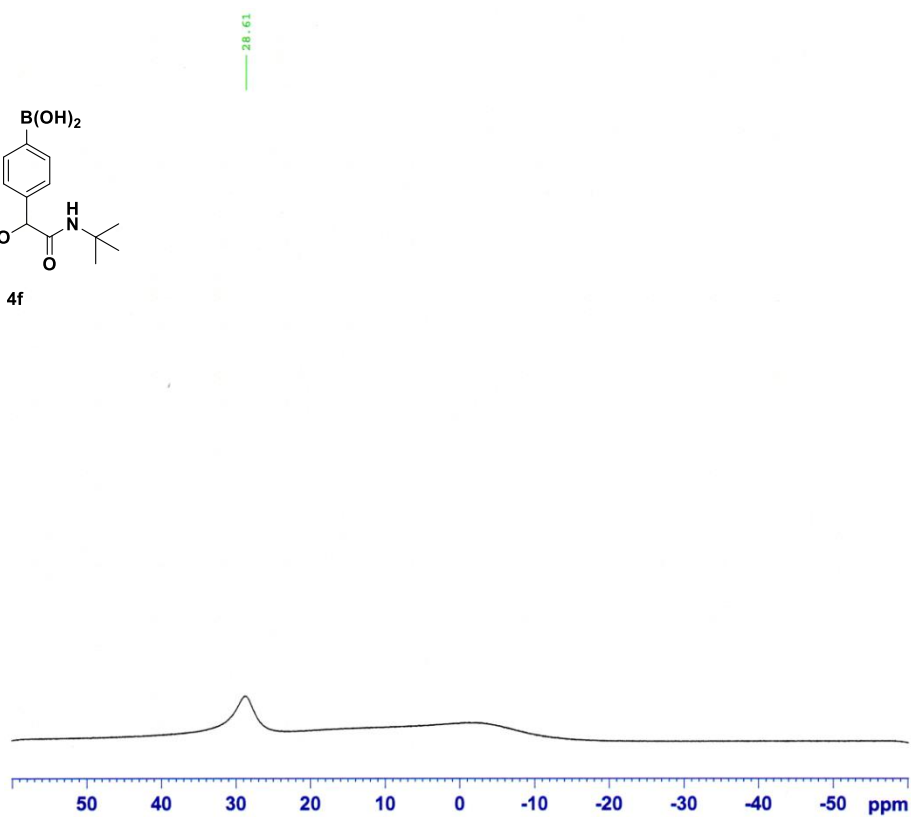

**Figure S23.** The  $^{11}\text{B}$  NMR spectrum of **4f** in  $\text{CD}_3\text{OD}$

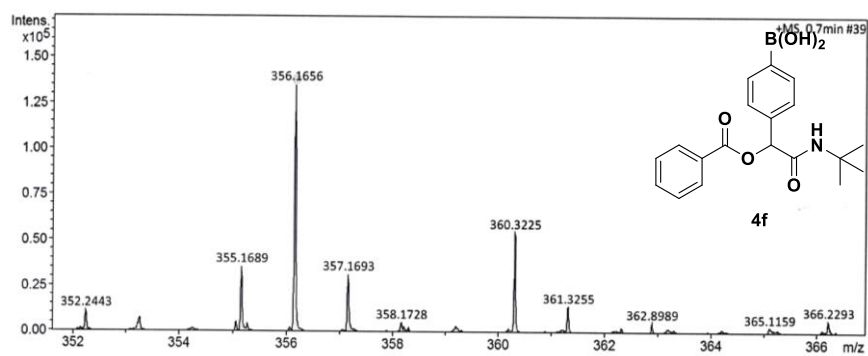

**Figure S24.** The HRMS (ESI $^+$ ) of spectrum of **4f**





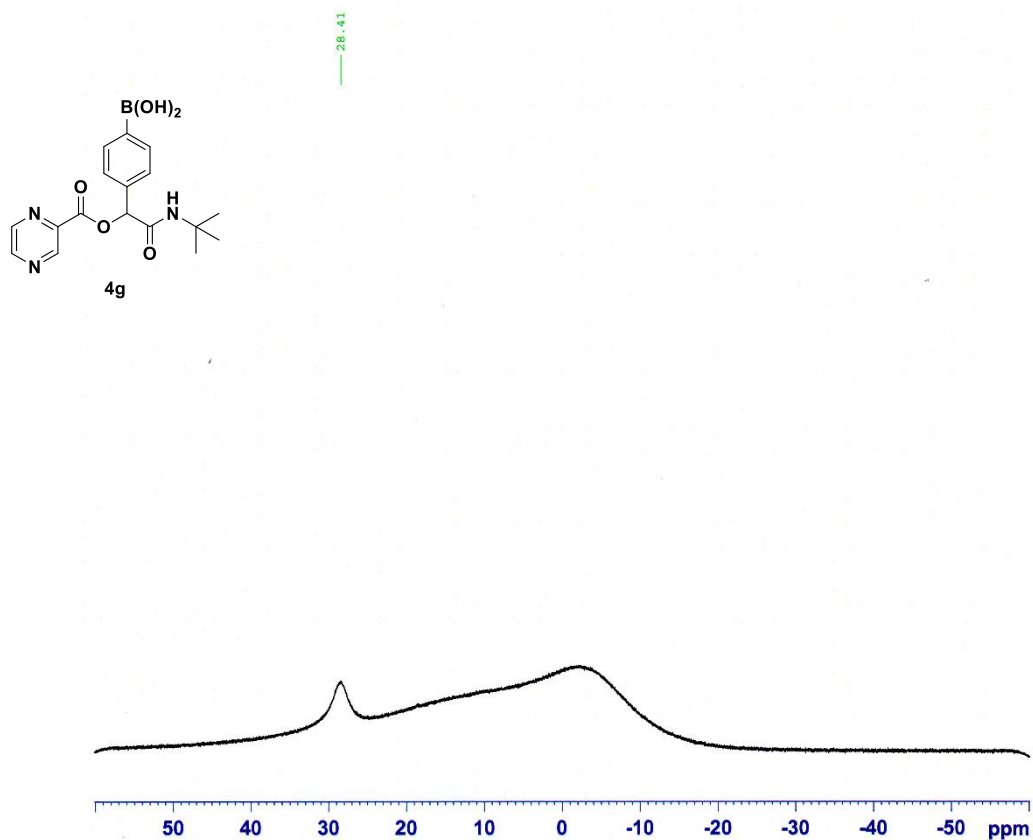

Figure S27. The <sup>11</sup>B NMR spectrum of **4g** in CD<sub>3</sub>OD

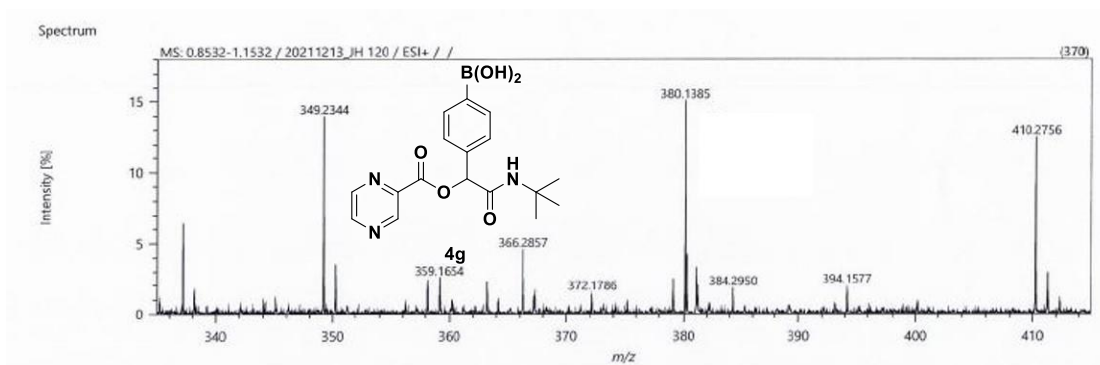

Figure S28. The HRMS (ESI<sup>+</sup>) of spectrum of **4g**

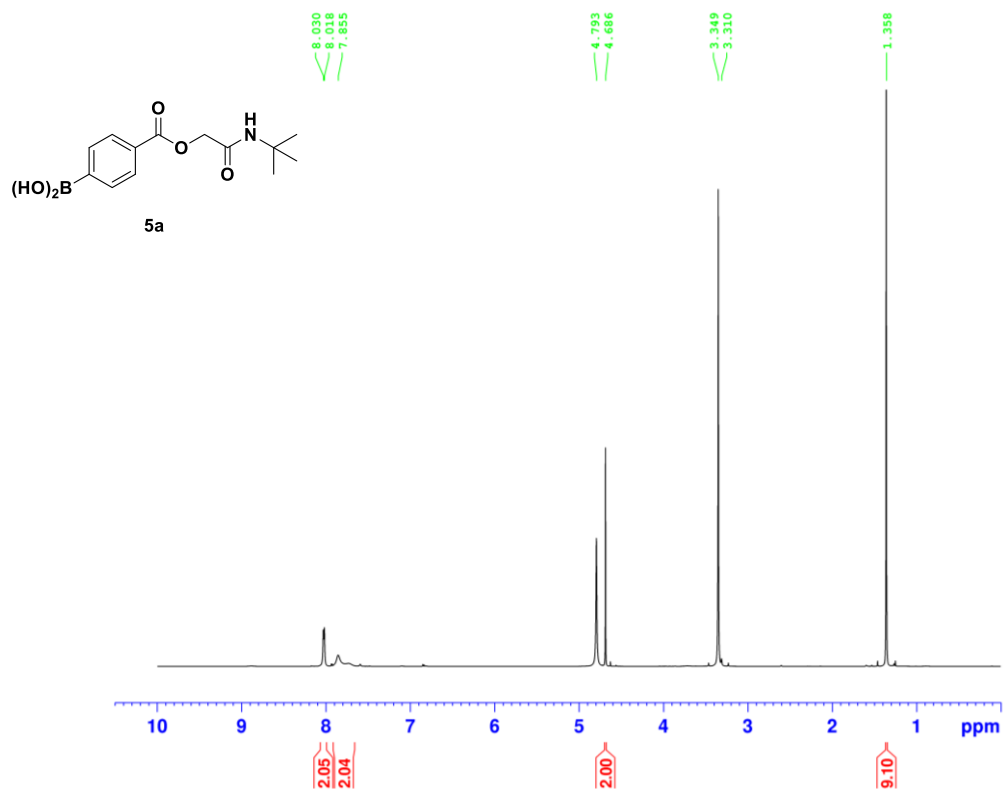

Figure S29. The  $^1\text{H}$  NMR spectrum of **5a** in  $\text{CD}_3\text{OD}$

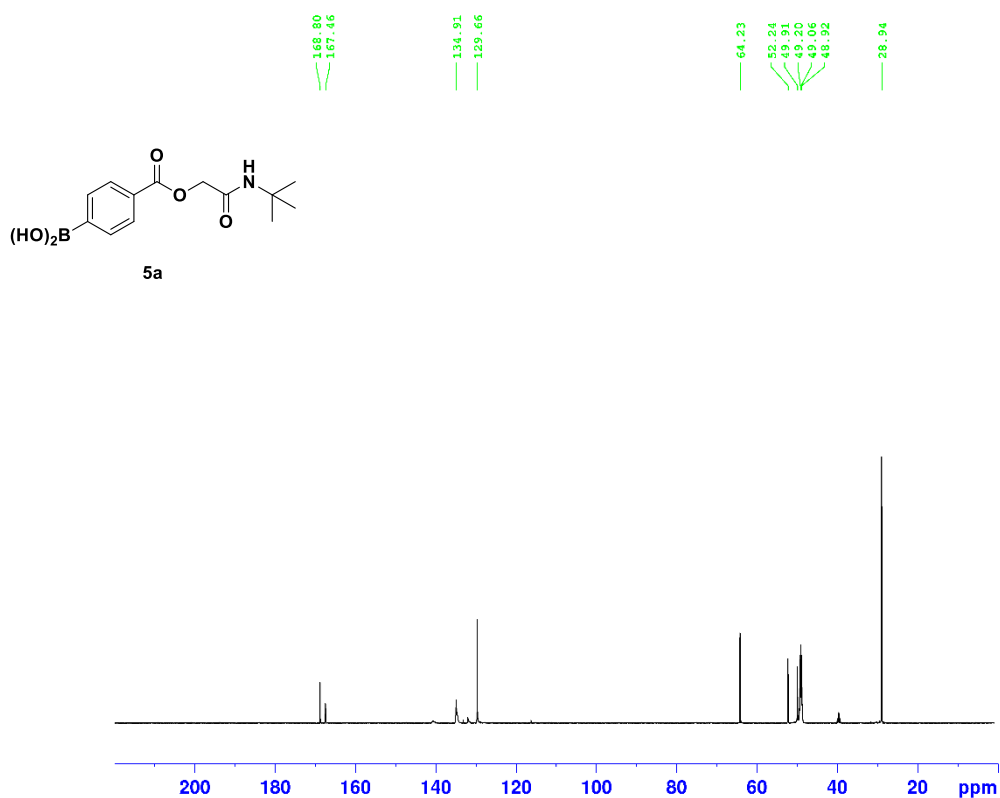

Figure S30. The  $^{13}\text{C}$  NMR spectrum of **5a** in  $\text{CD}_3\text{OD}$

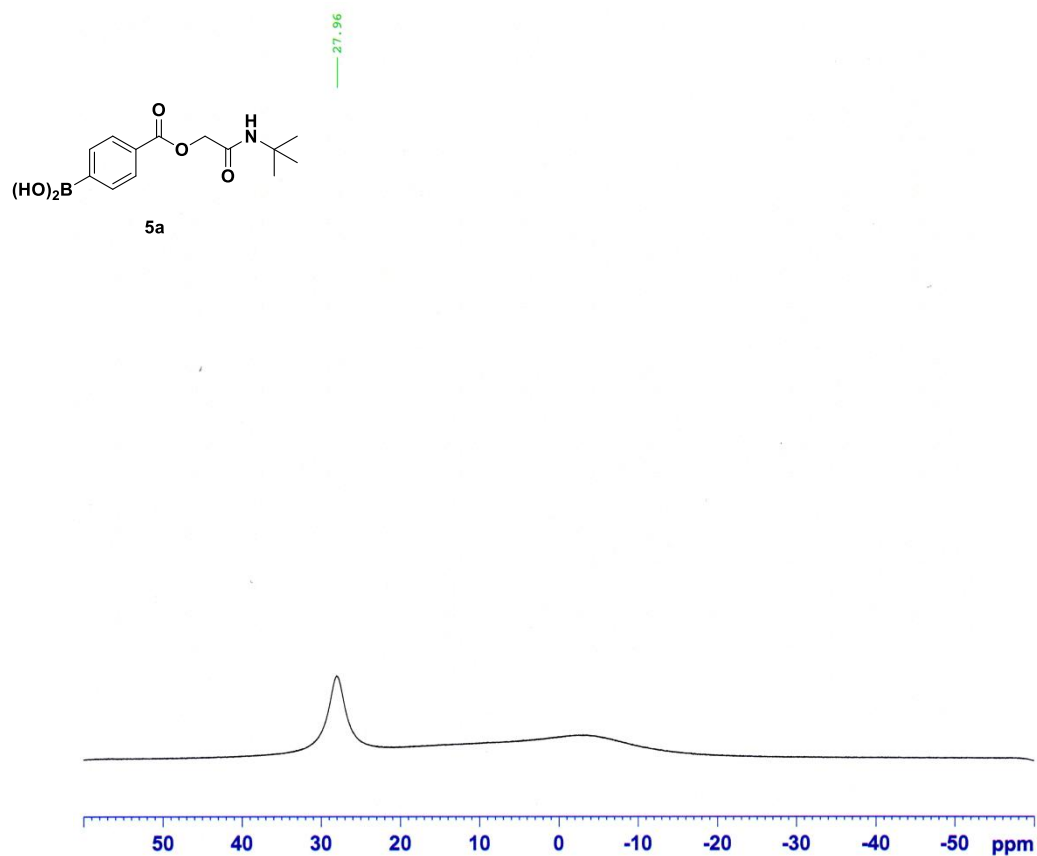

**Figure S31.** The  $^{11}\text{B}$  NMR spectrum of **5a** in  $\text{CD}_3\text{OD}$

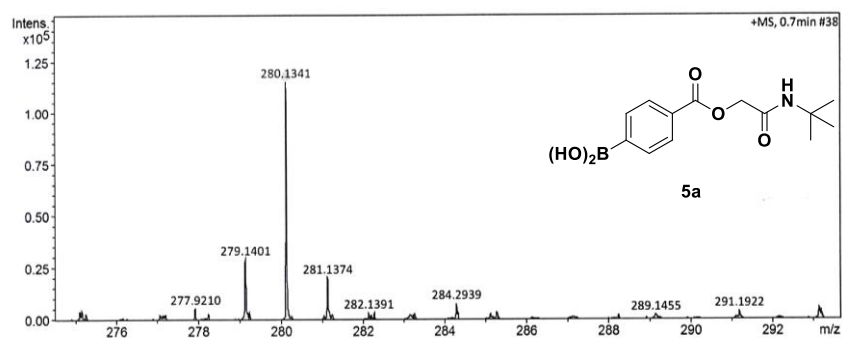

**Figure S32.** The HRMS (ESI $^+$ ) of spectrum of **5a**

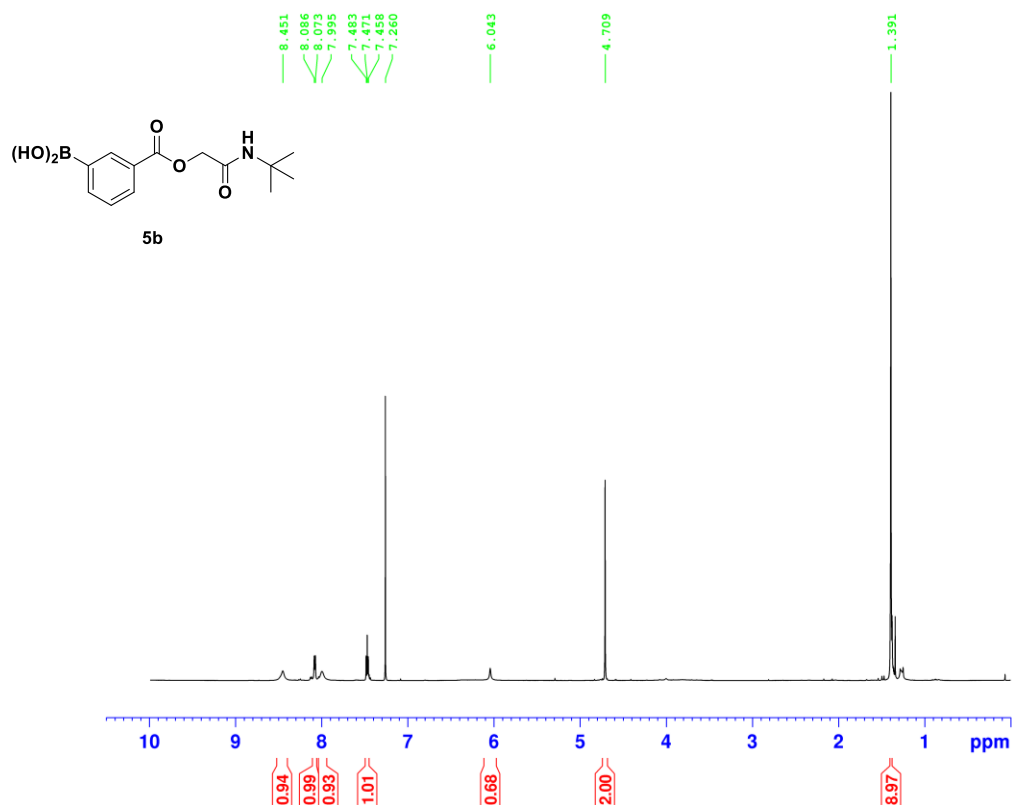

Figure S33. The <sup>1</sup>H NMR spectrum of **5b** in CD<sub>3</sub>OD

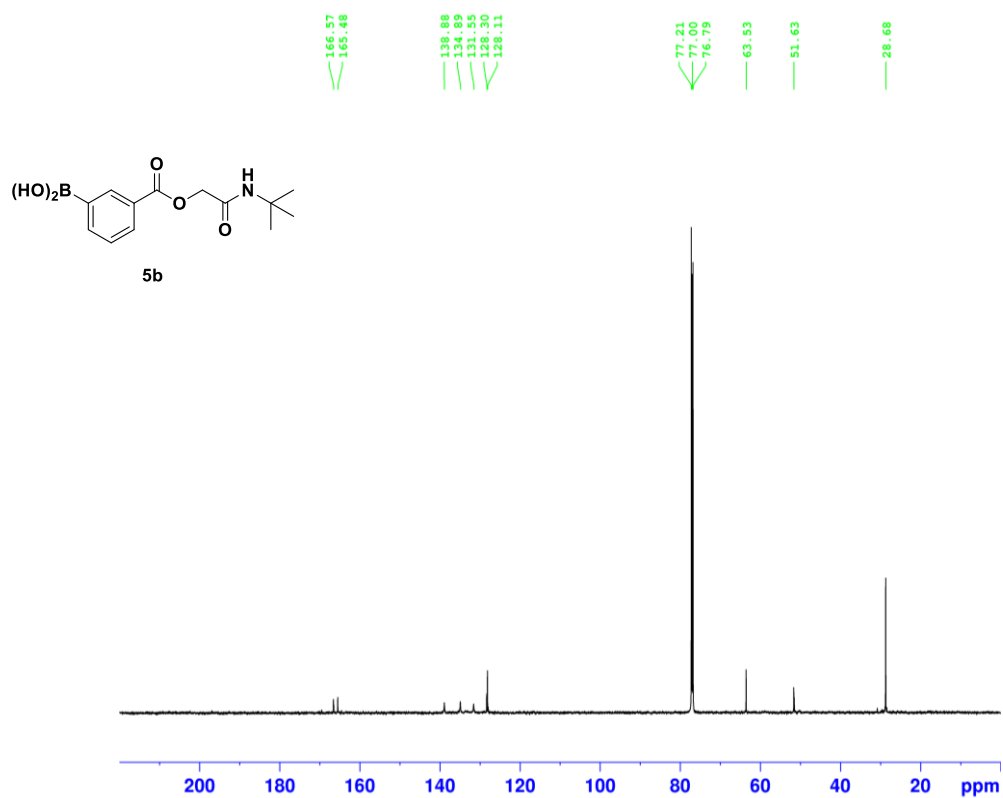

Figure S34. The <sup>13</sup>C NMR spectrum of **5b** in CD<sub>3</sub>OD

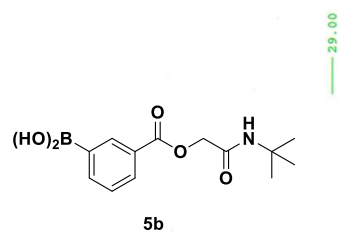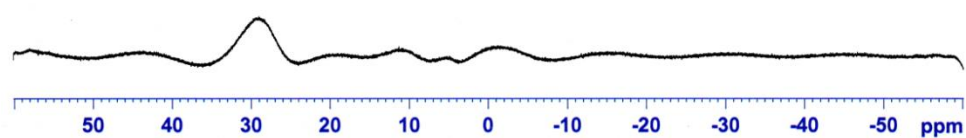

Figure S35. The  $^{11}B$  NMR spectrum of **5b** in  $CD_3OD$

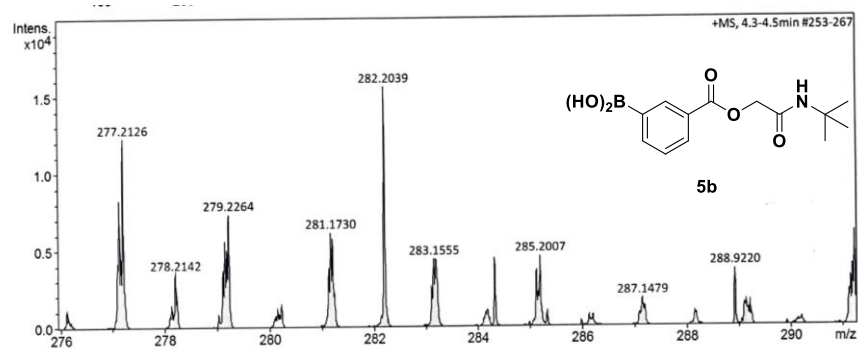

Figure S36. The HRMS ( $ESI^+$ ) of spectrum of **5b**



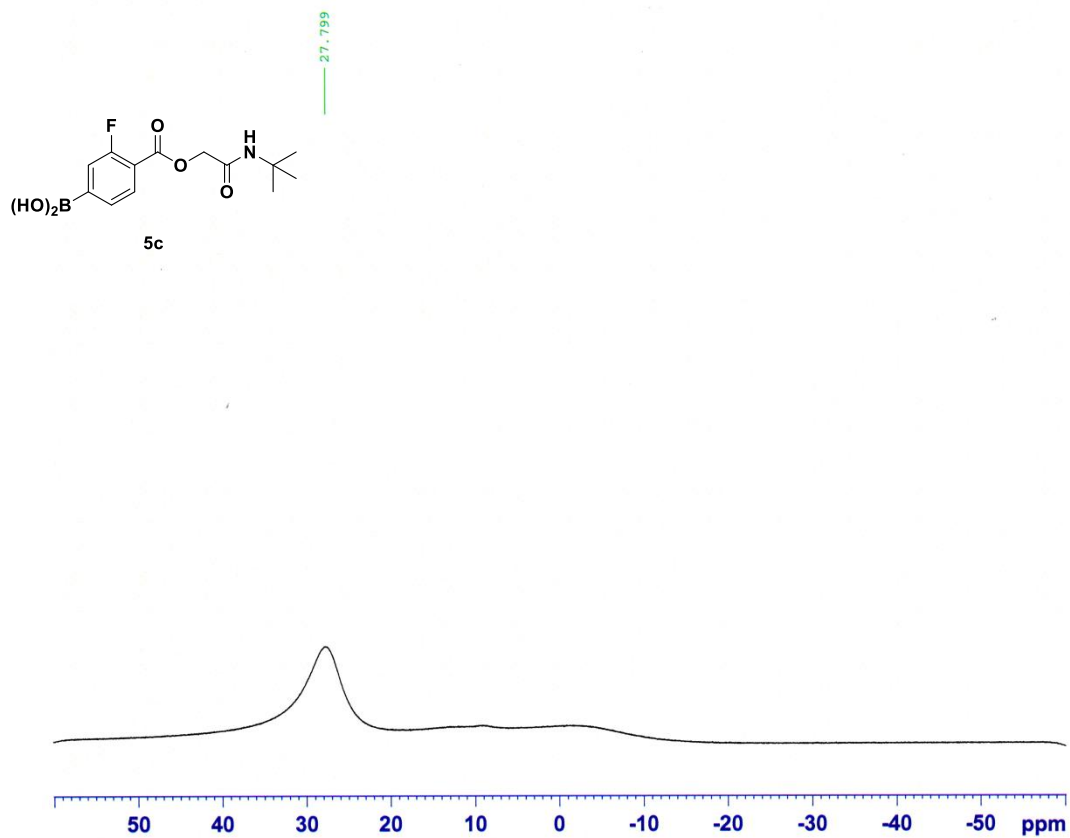

**Figure S39.** The  $^{11}\text{B}$  NMR spectrum of **5c** in  $\text{CD}_3\text{OD}$

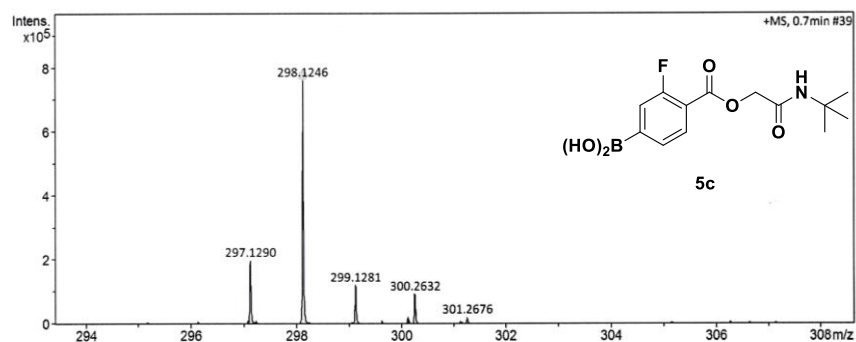

**Figure S40.** The HRMS (ESI $^+$ ) of spectrum of **5c**

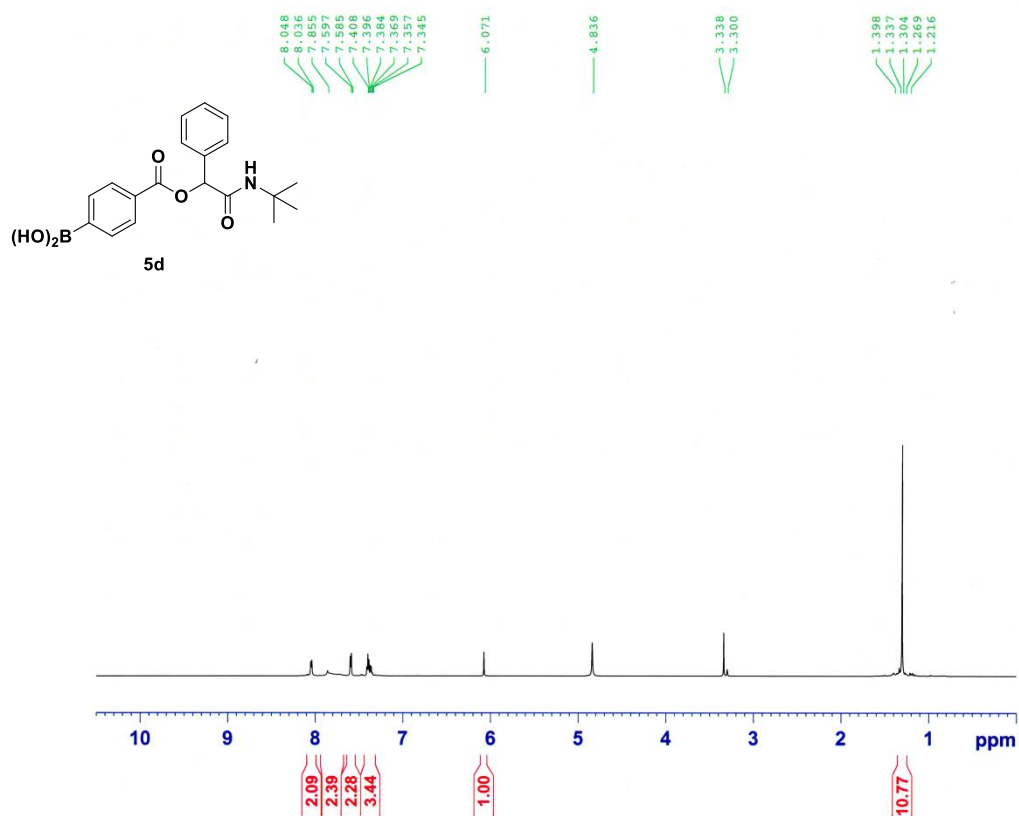

Figure S41. The  $^1\text{H}$  NMR spectrum of **5d** in  $\text{CD}_3\text{OD}$

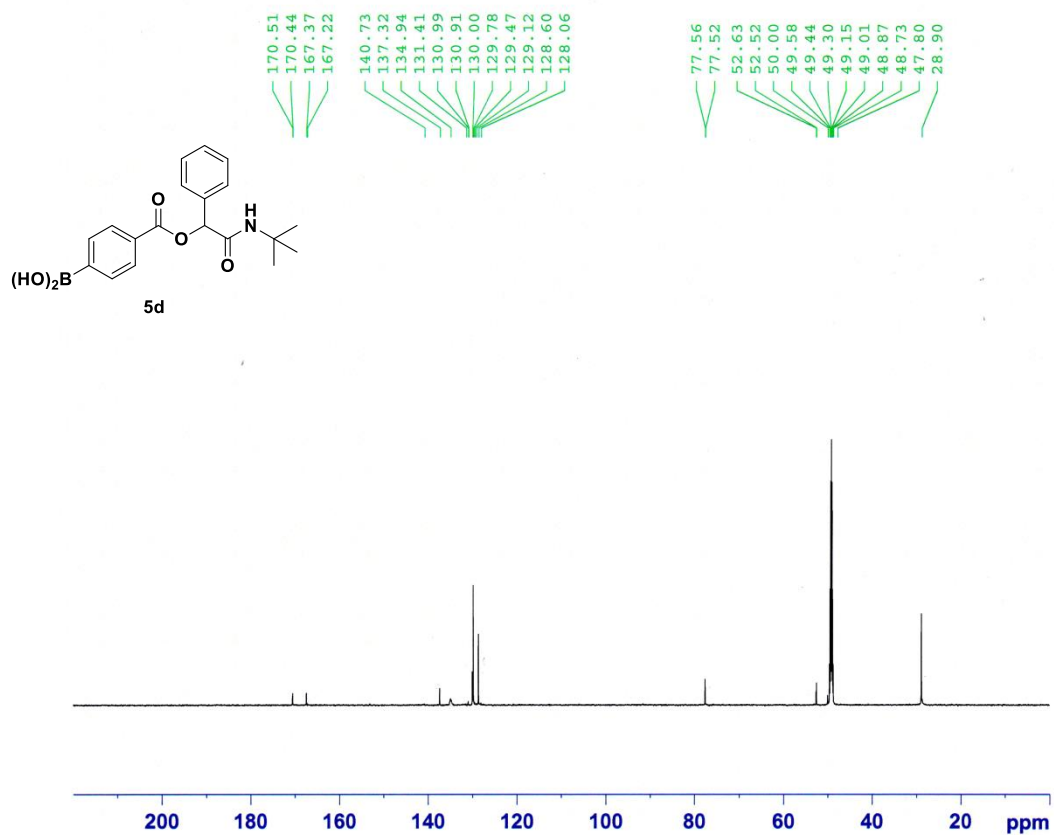

Figure S42. The  $^{13}\text{C}$  NMR spectrum of **5d** in  $\text{CD}_3\text{OD}$



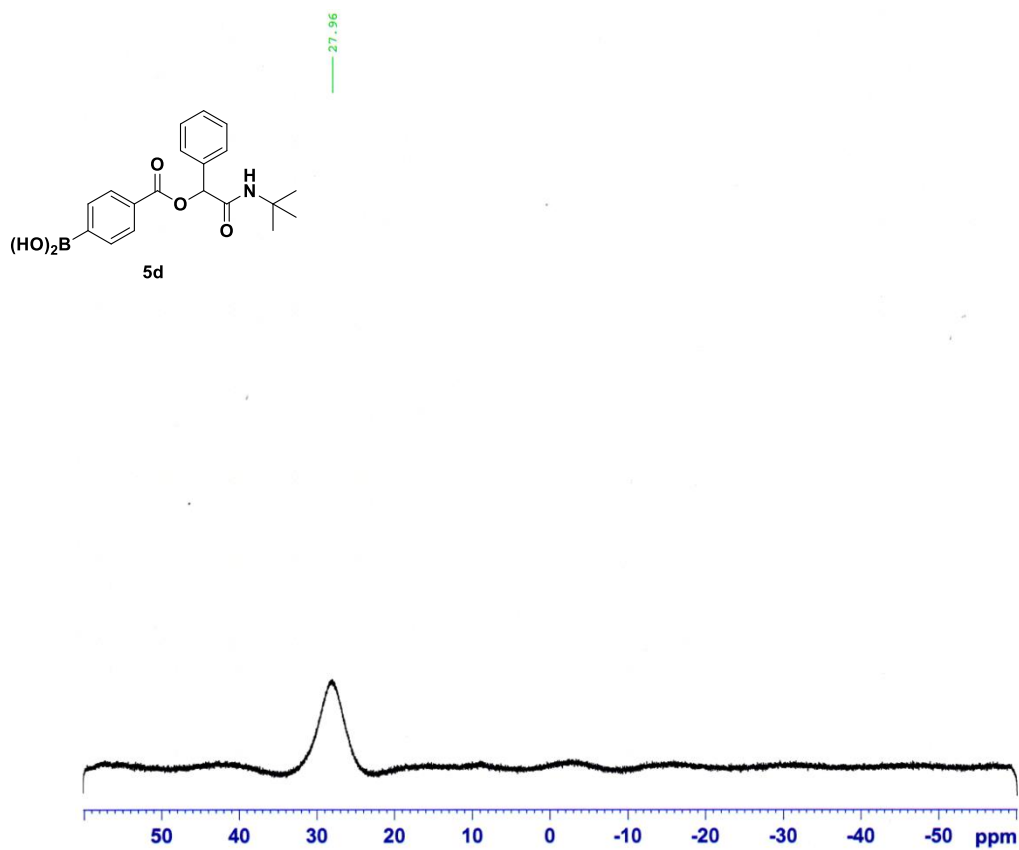

Figure S43. The  $^{11}\text{B}$  NMR spectrum of **5d** in  $\text{CD}_3\text{OD}$

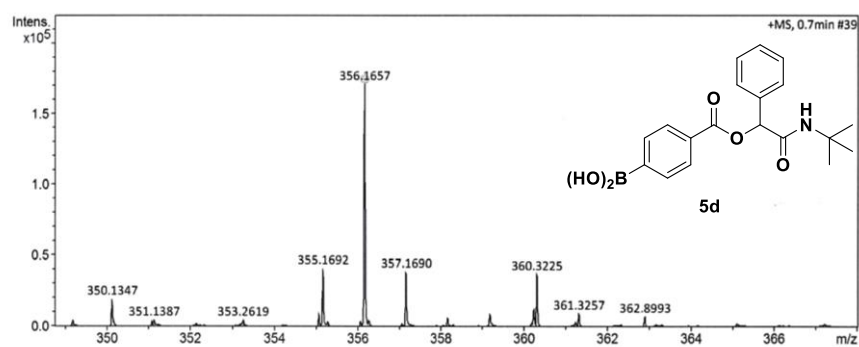

Figure S44. The HRMS (ESI $^+$ ) of spectrum of **5d**

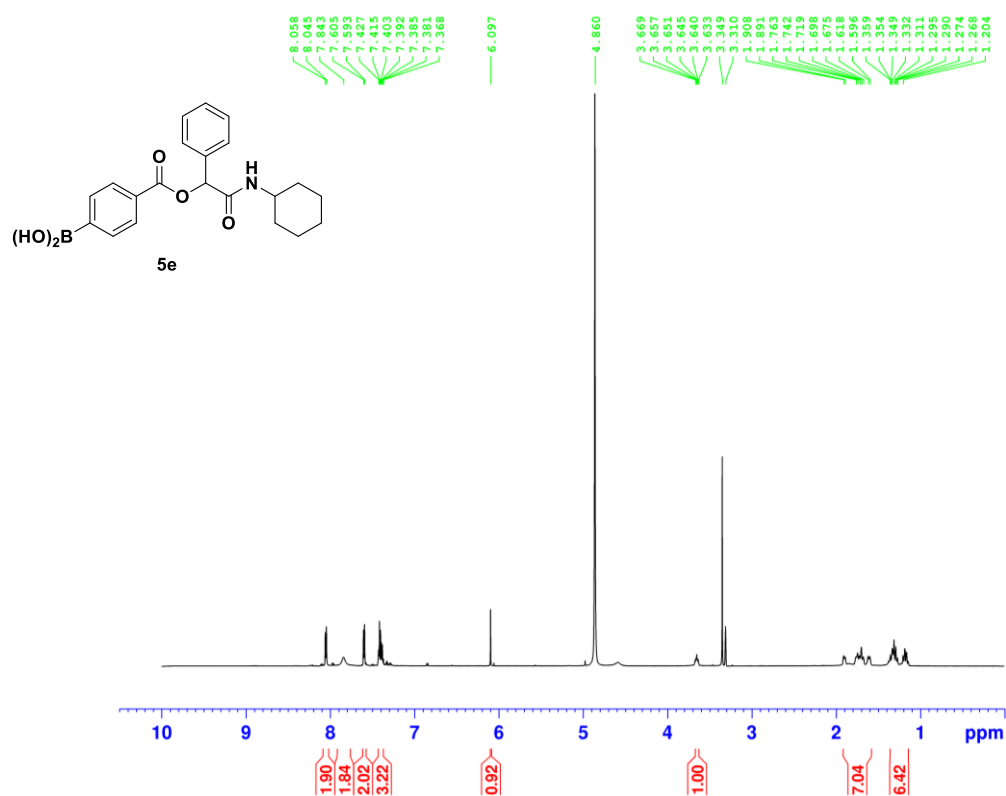

Figure S45. The <sup>1</sup>H NMR spectrum of 5e in CD<sub>3</sub>OD

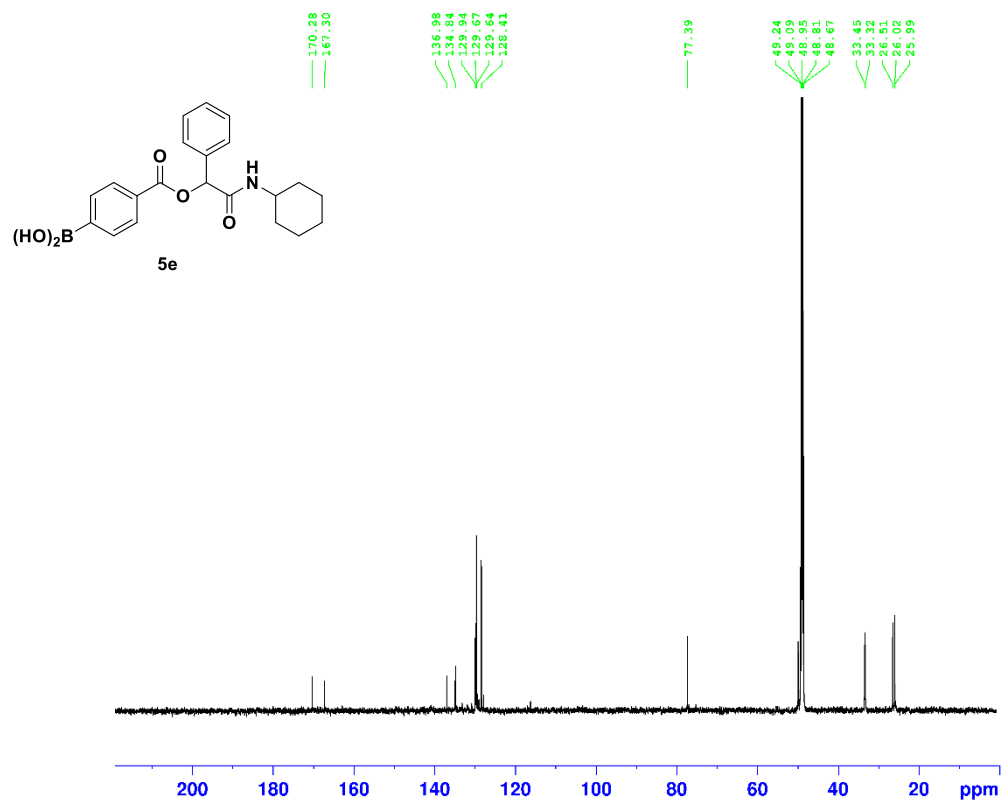

Figure S46. The <sup>13</sup>C NMR spectrum of 5e in CD<sub>3</sub>OD

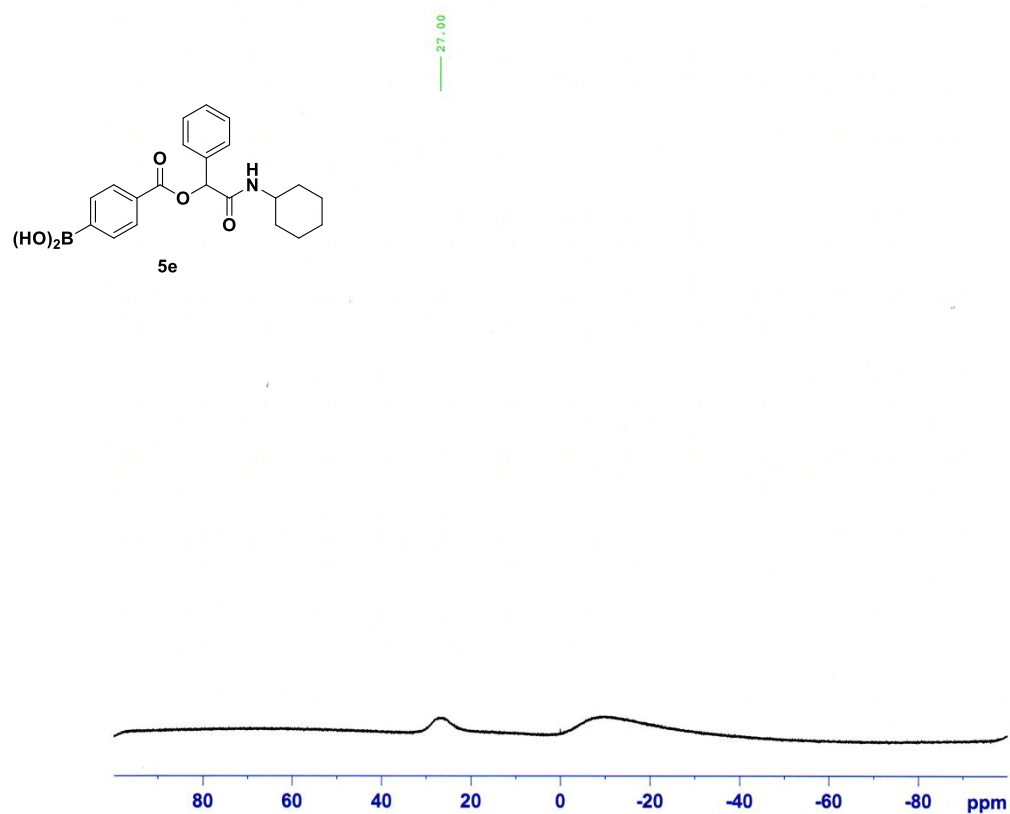

**Figure S47.** The <sup>11</sup>B NMR spectrum of **5e** in CD<sub>3</sub>OD

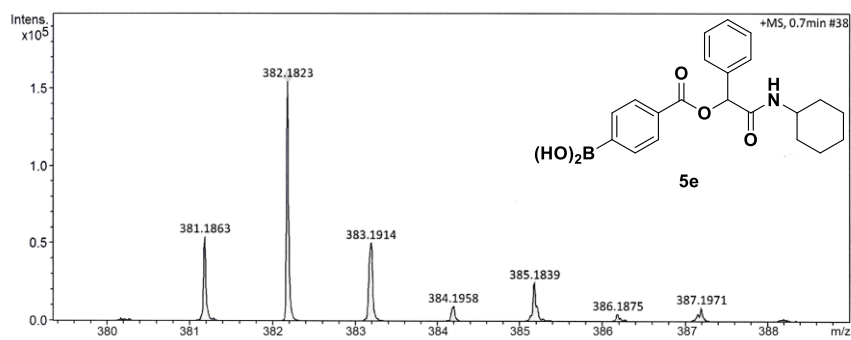

**Figure S48.** The HRMS (ESI<sup>+</sup>) of spectrum of **5e**

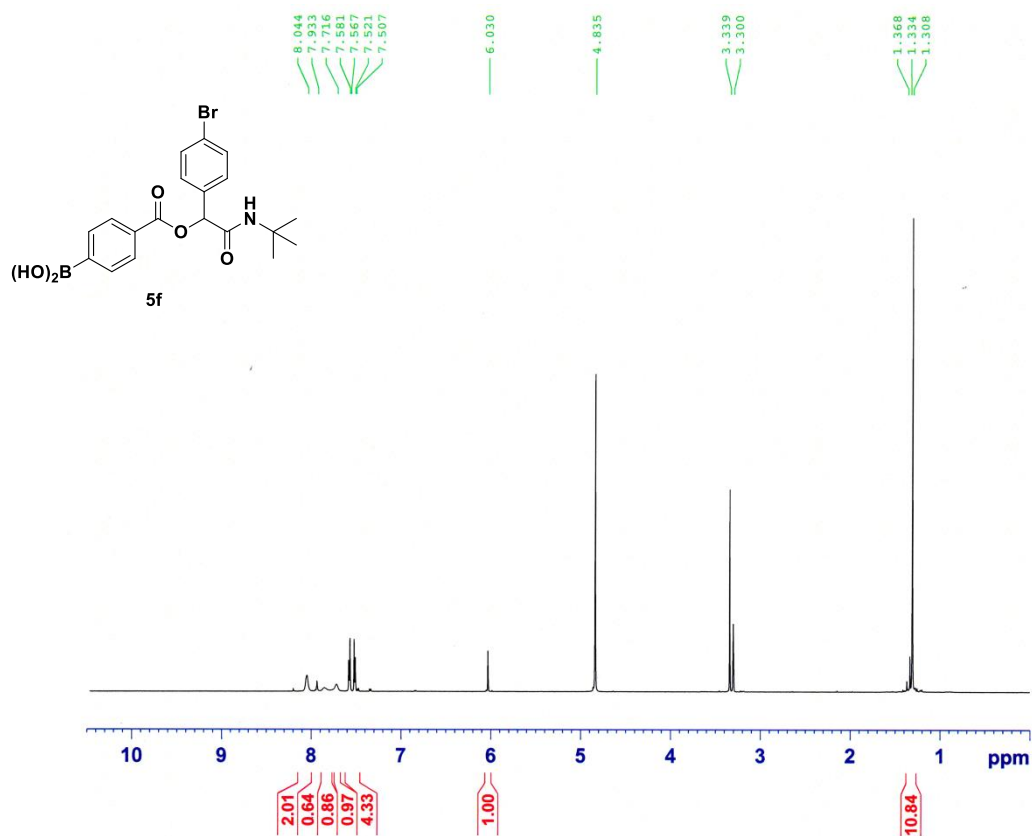

Figure S49. The  $^1\text{H}$  NMR spectrum of **5f** in  $\text{CD}_3\text{OD}$

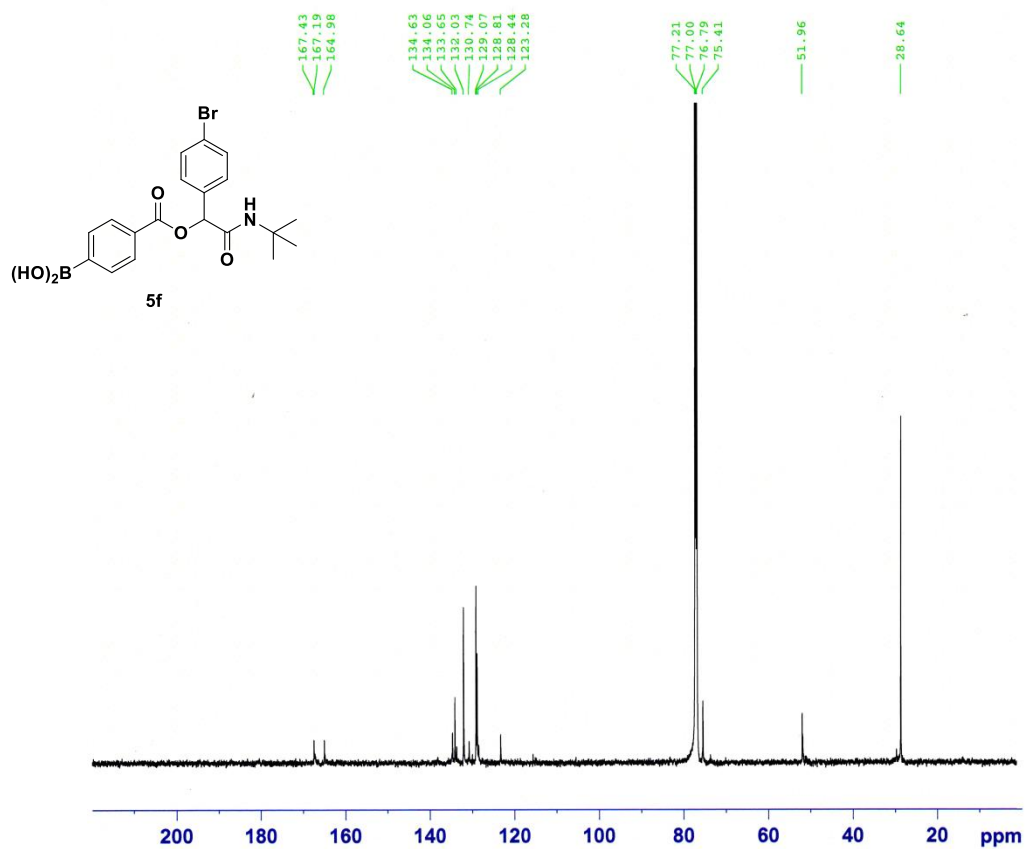

Figure S50. The  $^{13}\text{C}$  NMR spectrum of **5f** in  $\text{CDCl}_3$

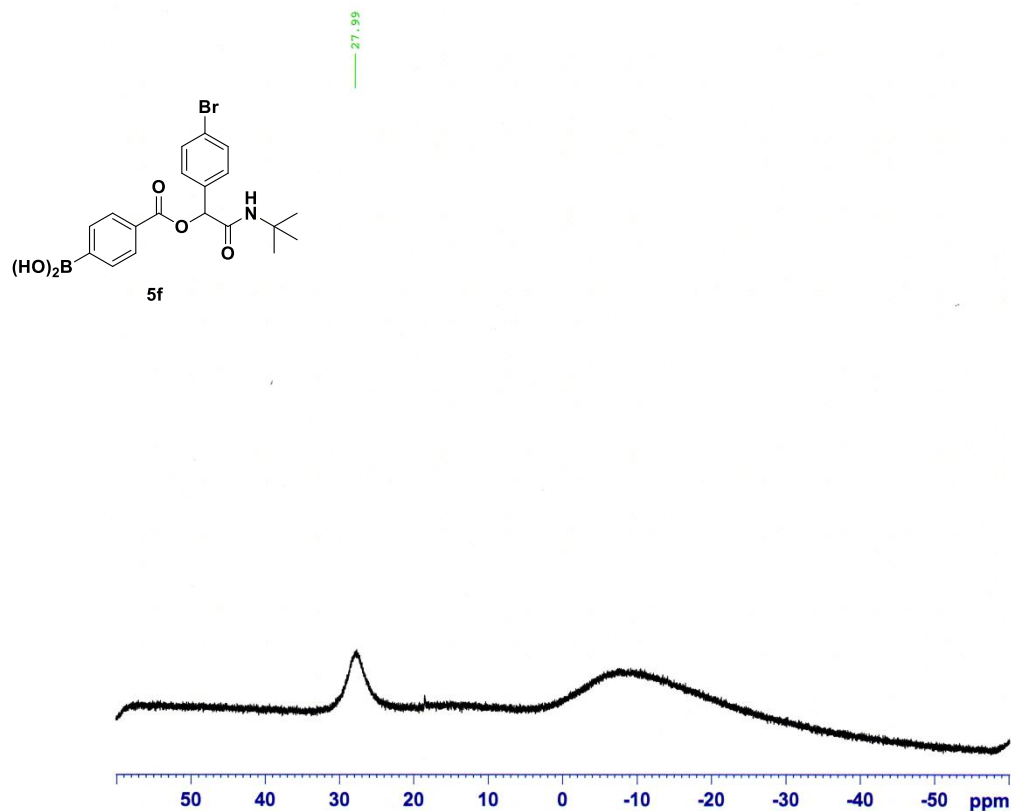

Figure S51. The  $^{11}\text{B}$  NMR spectrum of **5f** in  $\text{CD}_3\text{OD}$

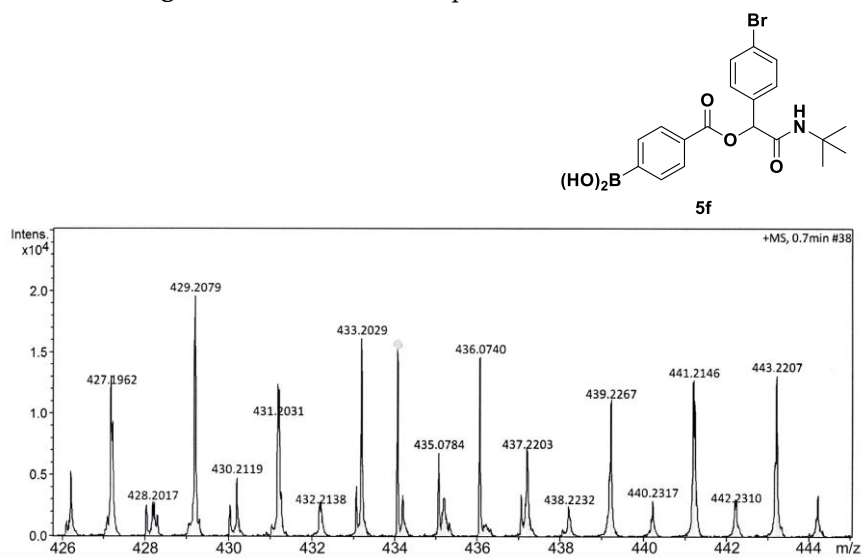

Figure S52. The HRMS (ESI $^+$ ) of spectrum of **5f**

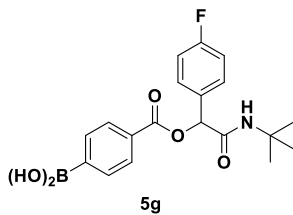

CC(C)(C)NC(=O)C(c1ccc(F)cc1)C(=O)c2ccc(B(O)O)cc2

5g

170.35  
 167.27  
 165.35  
 163.71  
 135.07  
 134.68  
 133.45  
 130.75  
 130.72  
 129.80  
 116.64  
 116.49  
 76.83  
 52.66  
 49.58  
 49.44  
 49.30  
 49.01  
 48.82  
 48.97  
 48.73  
 28.89

ppm

**Figure S54.** The  $^{13}\text{C}$  NMR spectrum of **5g** in  $\text{CD}_3\text{OD}$

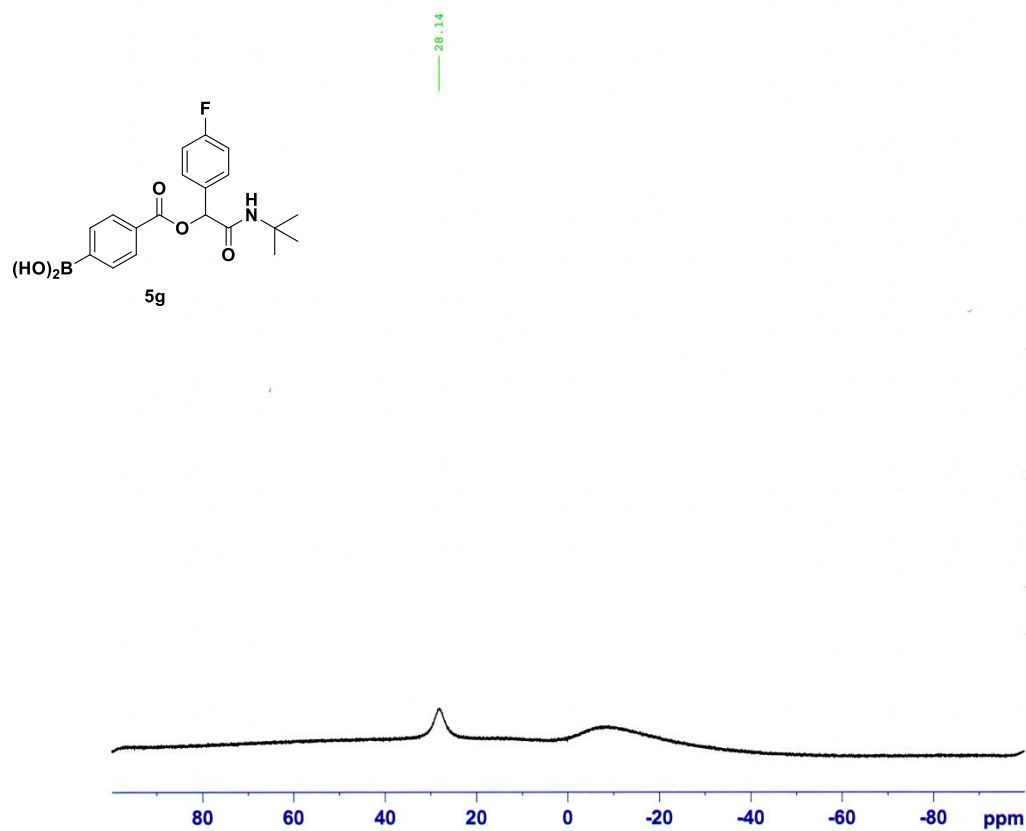

Figure S55. The <sup>11</sup>B NMR spectrum of **5g** in CD<sub>3</sub>OD

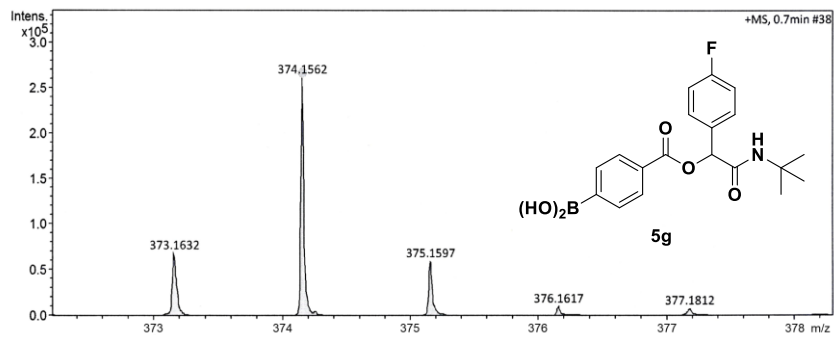

Figure S56. The HRMS (ESI<sup>+</sup>) of spectrum of **5g**







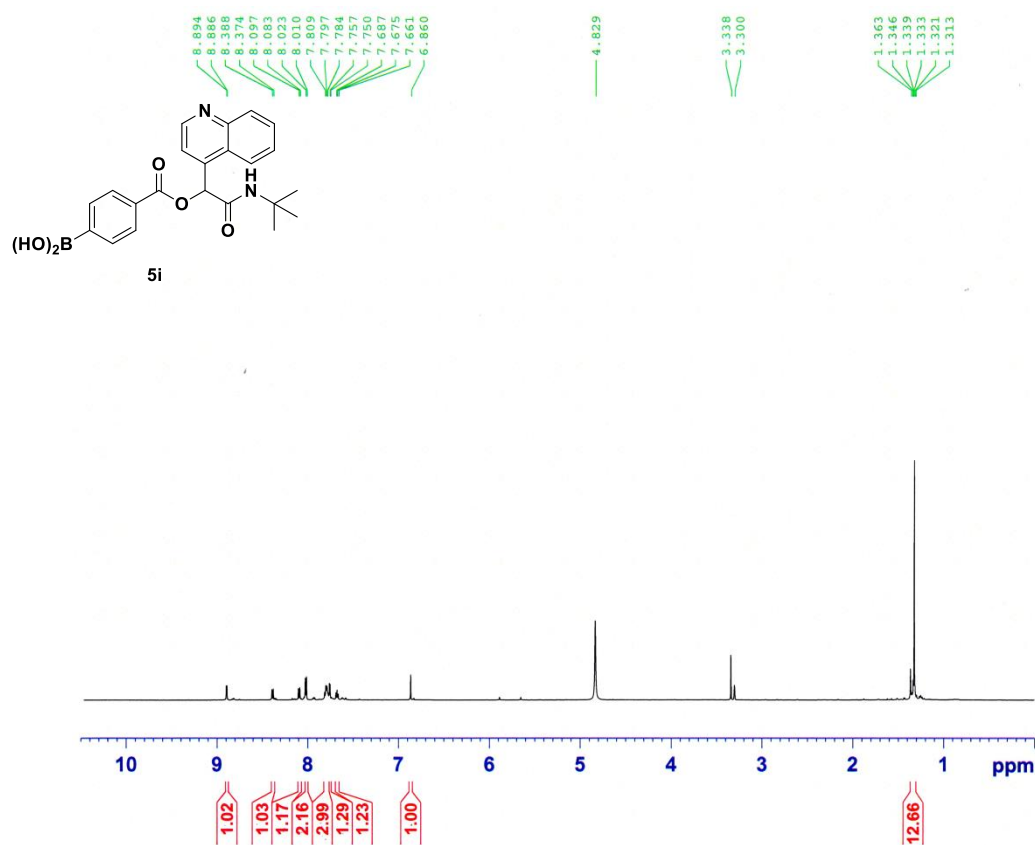

Figure S61. The  $^1\text{H}$  NMR spectrum of **5i** in  $\text{CD}_3\text{OD}$

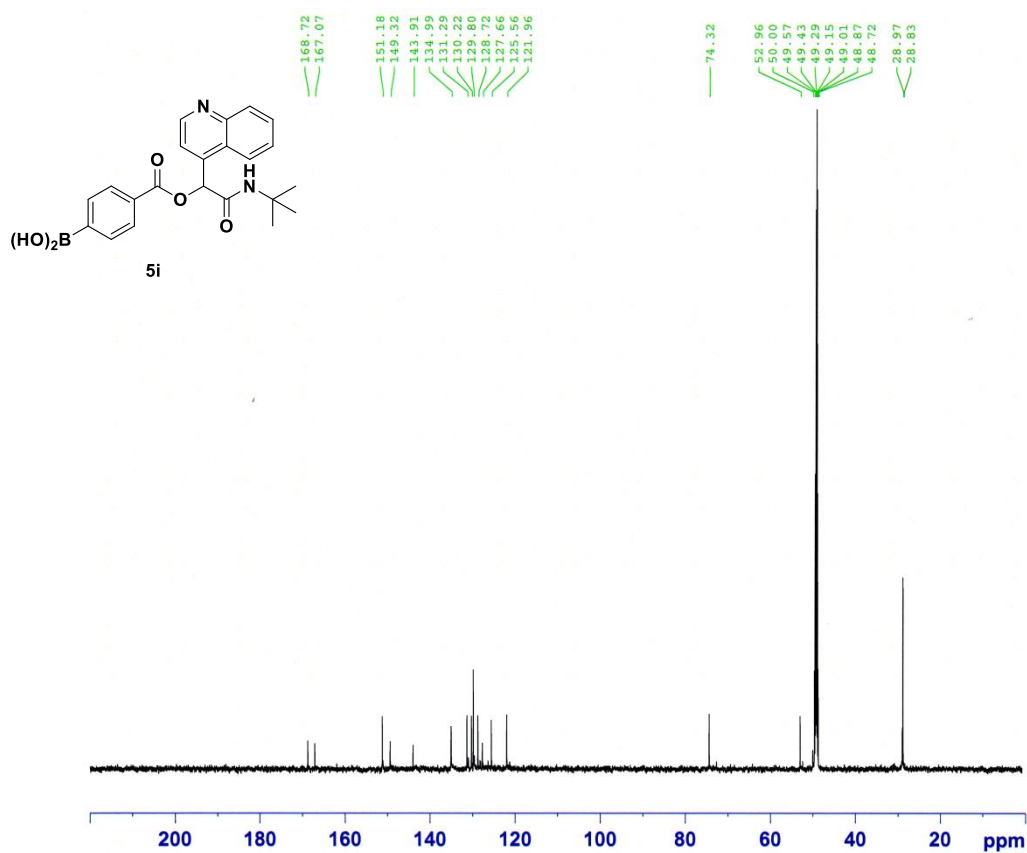

Figure S62. The  $^{13}\text{C}$  NMR spectrum of **5i** in  $\text{CD}_3\text{OD}$

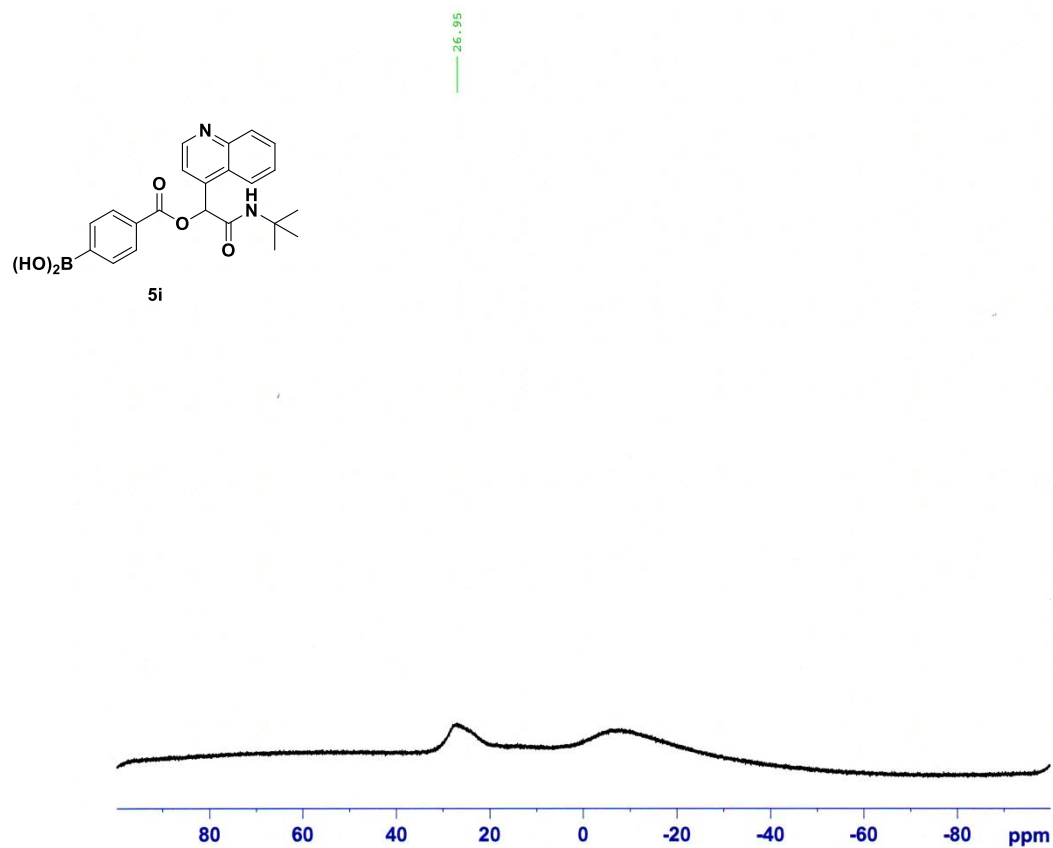

Figure S63. The  $^{11}\text{B}$  NMR spectrum of **5i** in  $\text{CD}_3\text{OD}$

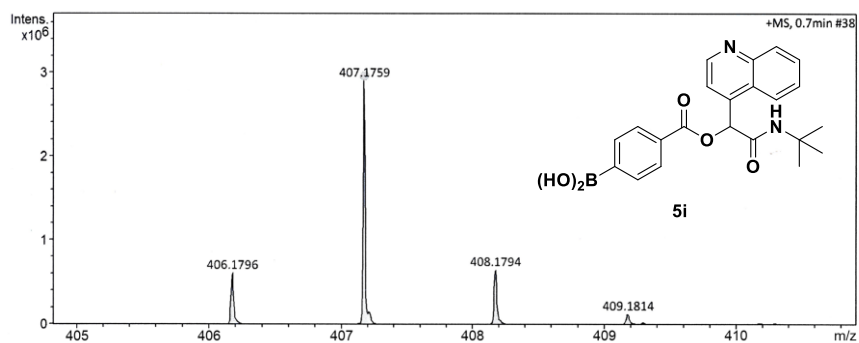

Figure S64. The HRMS (ESI $^+$ ) of spectrum of **5i**

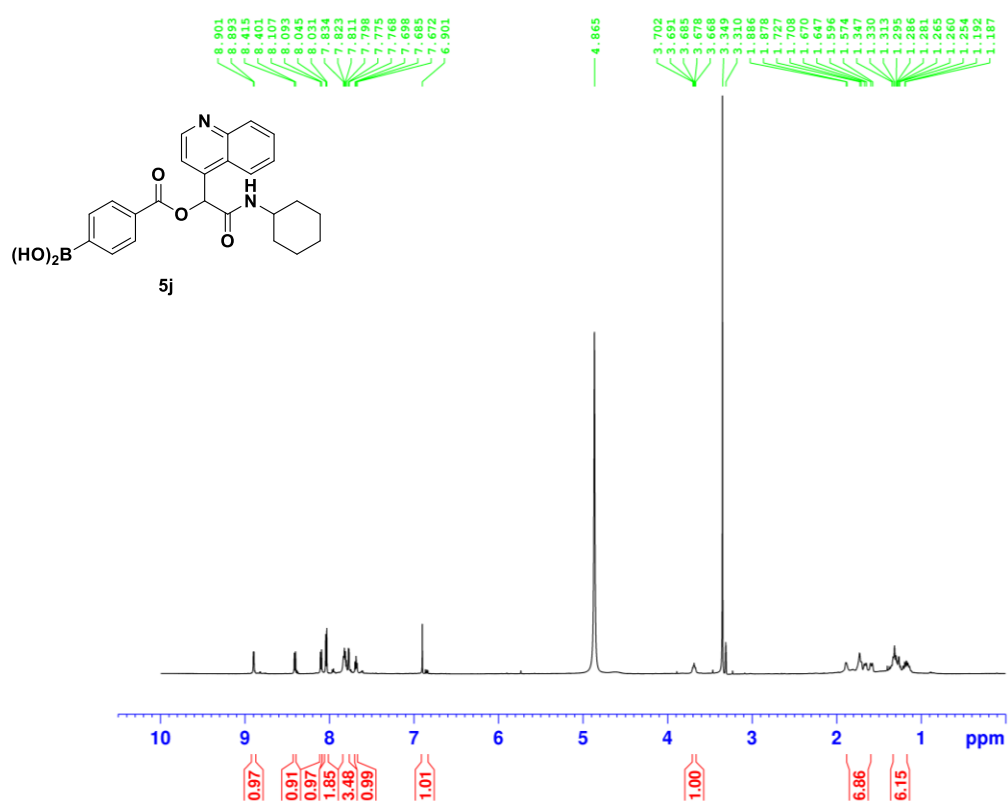

Figure S65. The  $^1\text{H}$  NMR spectrum of **5j** in  $\text{CD}_3\text{OD}$

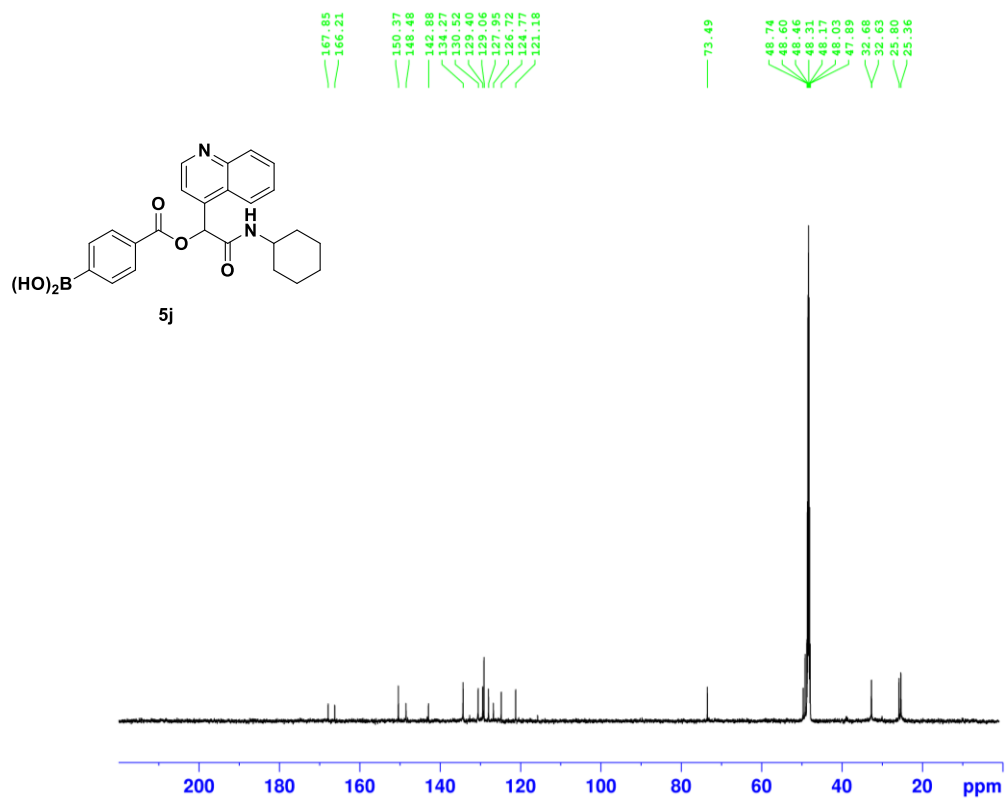

Figure S66. The  $^{13}\text{C}$  NMR spectrum of **5j** in  $\text{CD}_3\text{OD}$

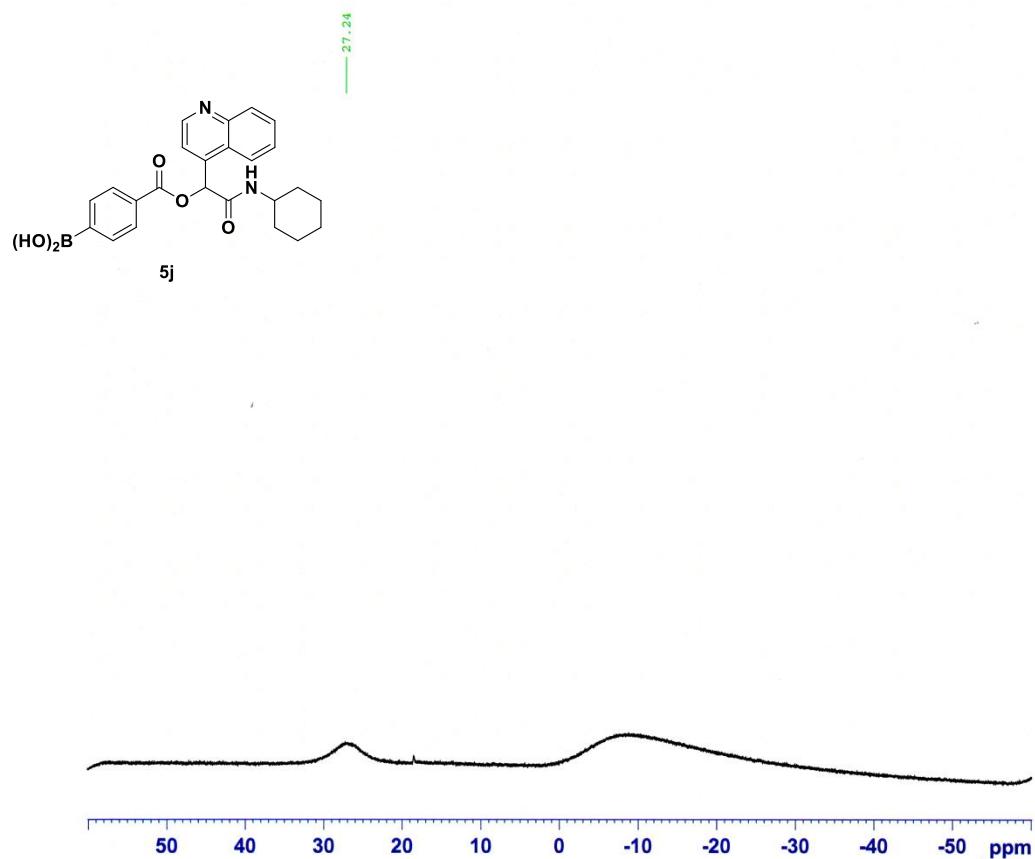

Figure S67. The  $^{11}\text{B}$  NMR spectrum of **5j** in  $\text{CD}_3\text{OD}$

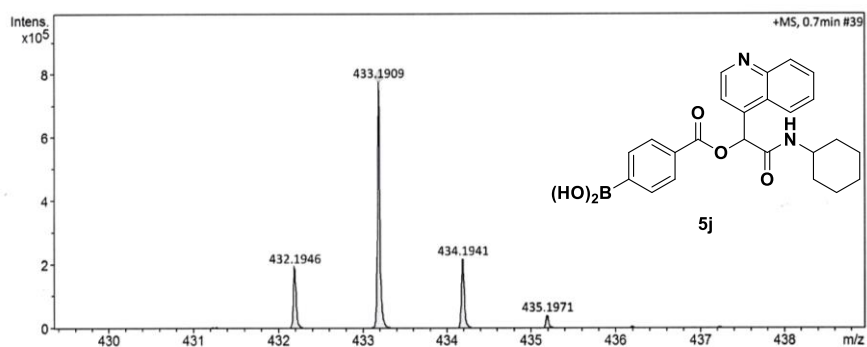

Figure S68. The HRMS (ESI $^+$ ) of spectrum of **5j**

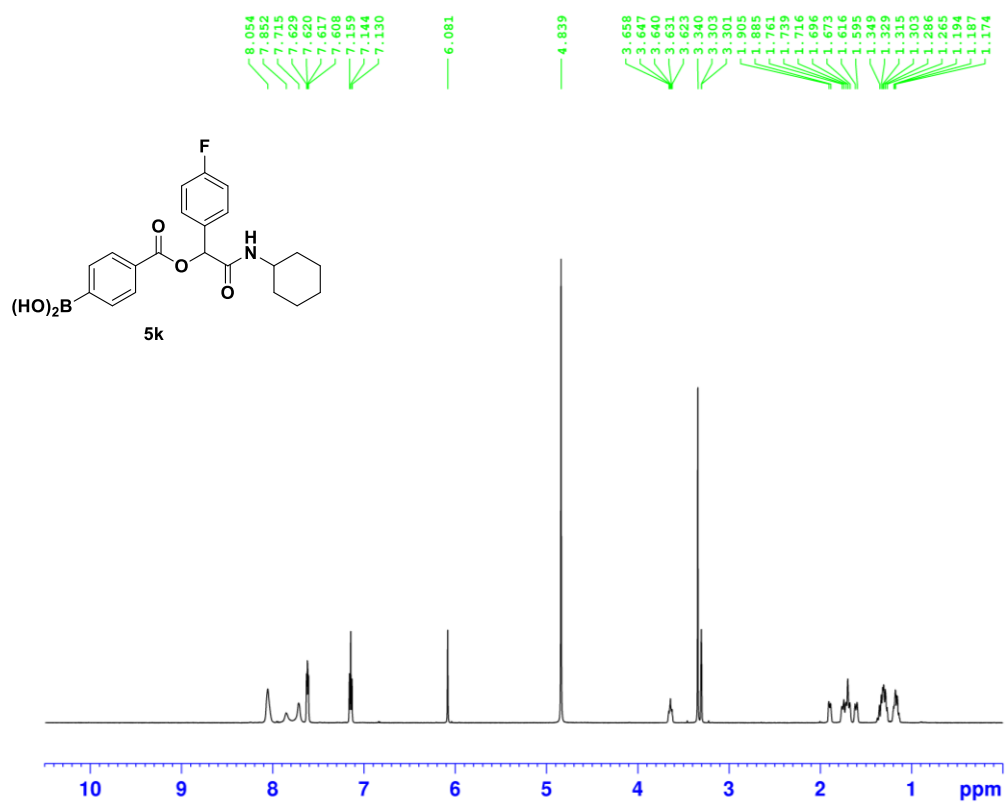

Figure S69. The <sup>1</sup>H NMR spectrum of **5k** in CD<sub>3</sub>OD

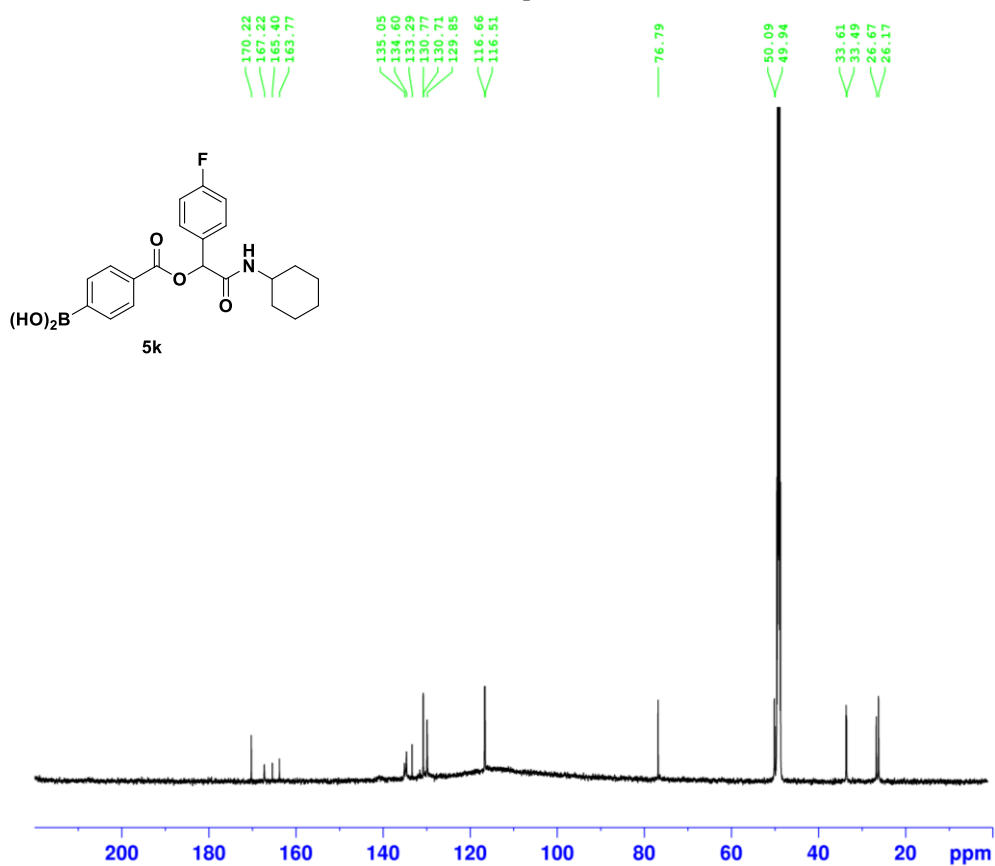

Figure S70. The <sup>13</sup>C NMR spectrum of **5k** in CD<sub>3</sub>OD

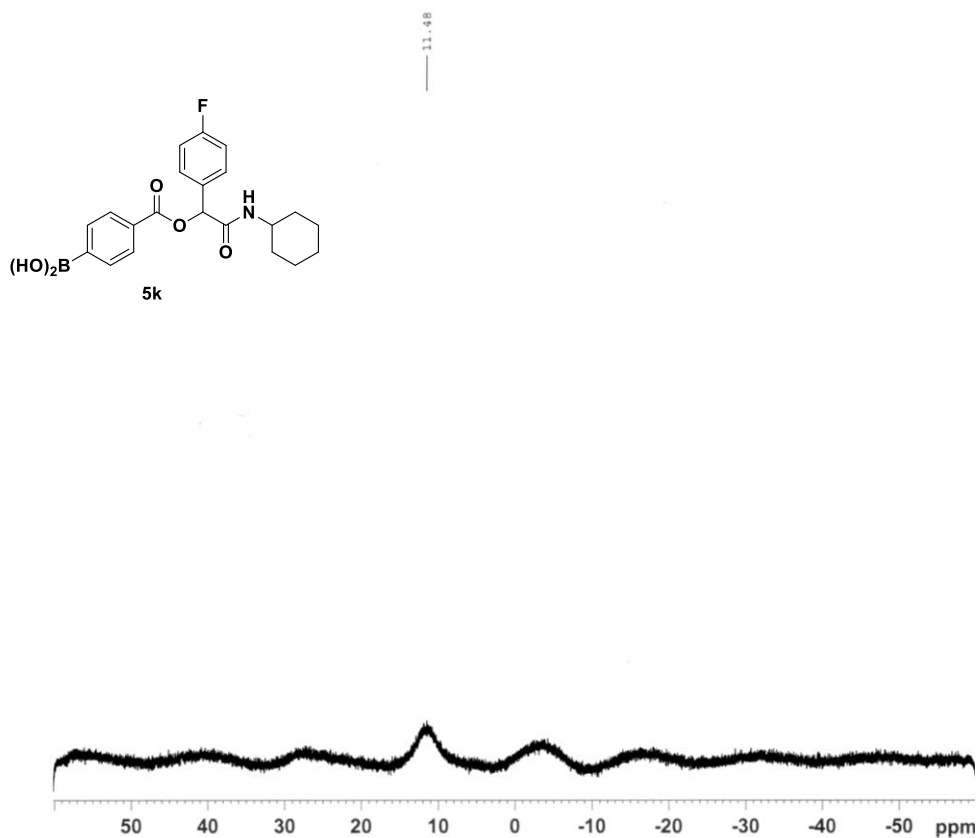

**Figure S71.** The  $^{11}\text{B}$  NMR spectrum of **5k** in  $\text{CD}_3\text{OD}$

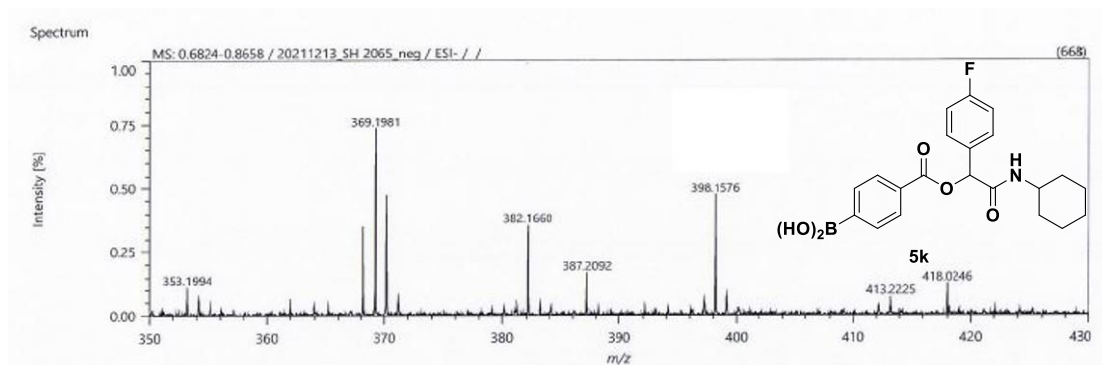

**Figure S72.** The HRMS (ESI-) of spectrum of **5k**

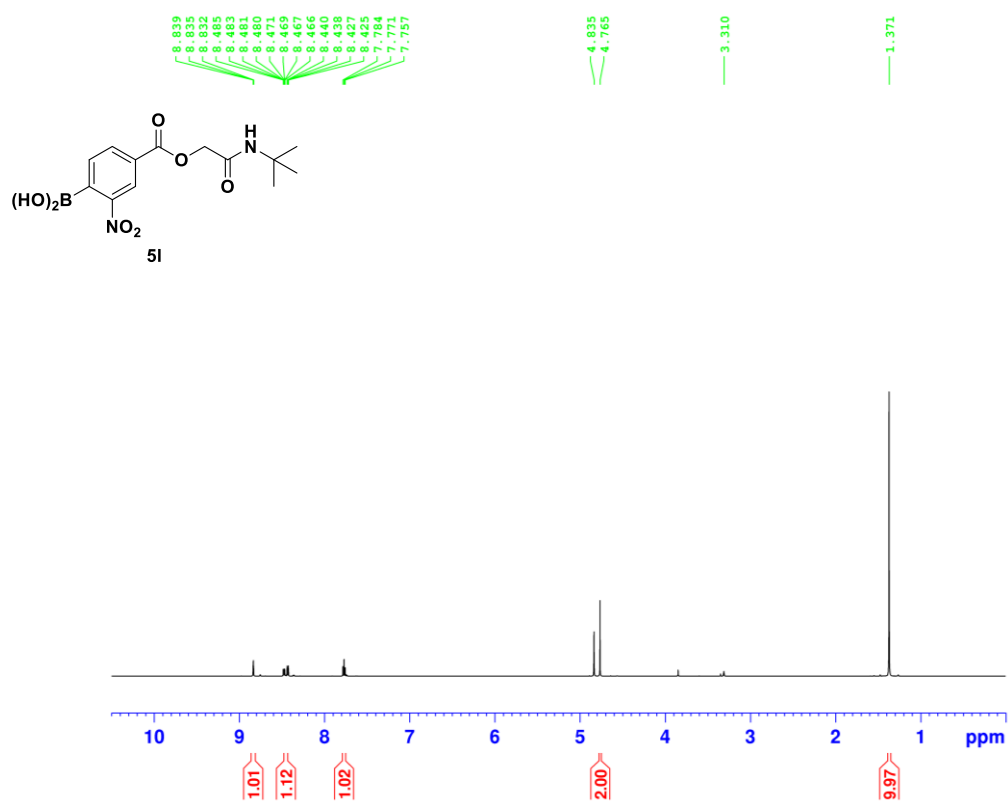

Figure S73. The <sup>1</sup>H NMR spectrum of **5I** in CD<sub>3</sub>OD

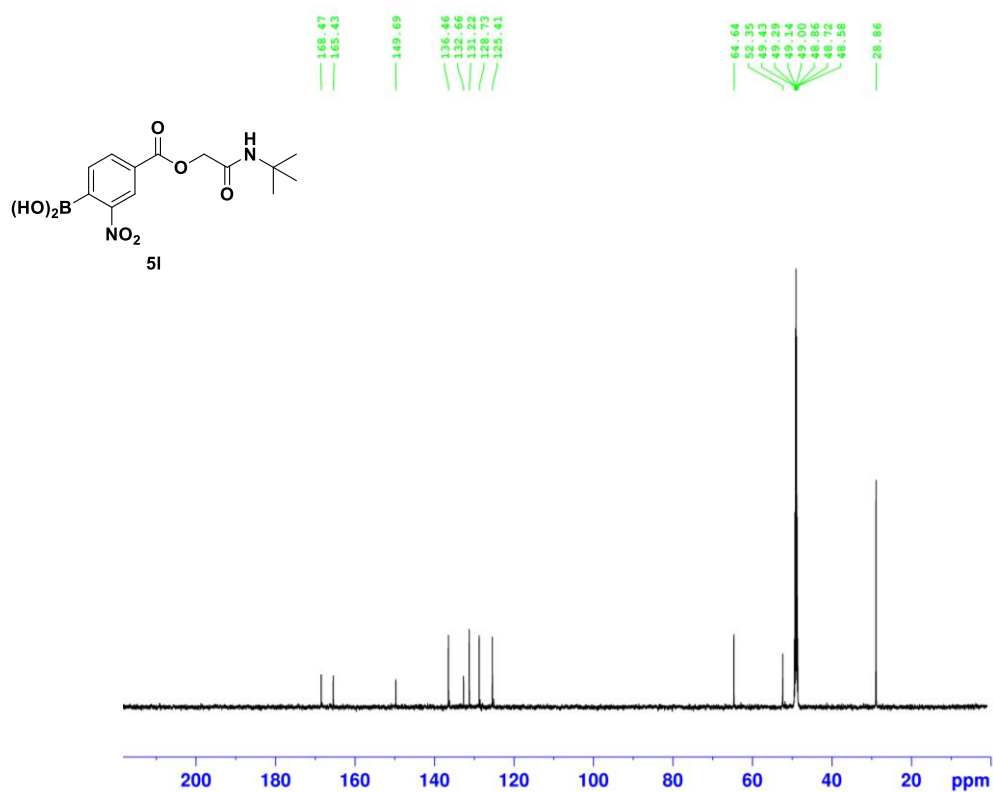

Figure S74. The <sup>13</sup>C NMR spectrum of **5I** in CD<sub>3</sub>OD



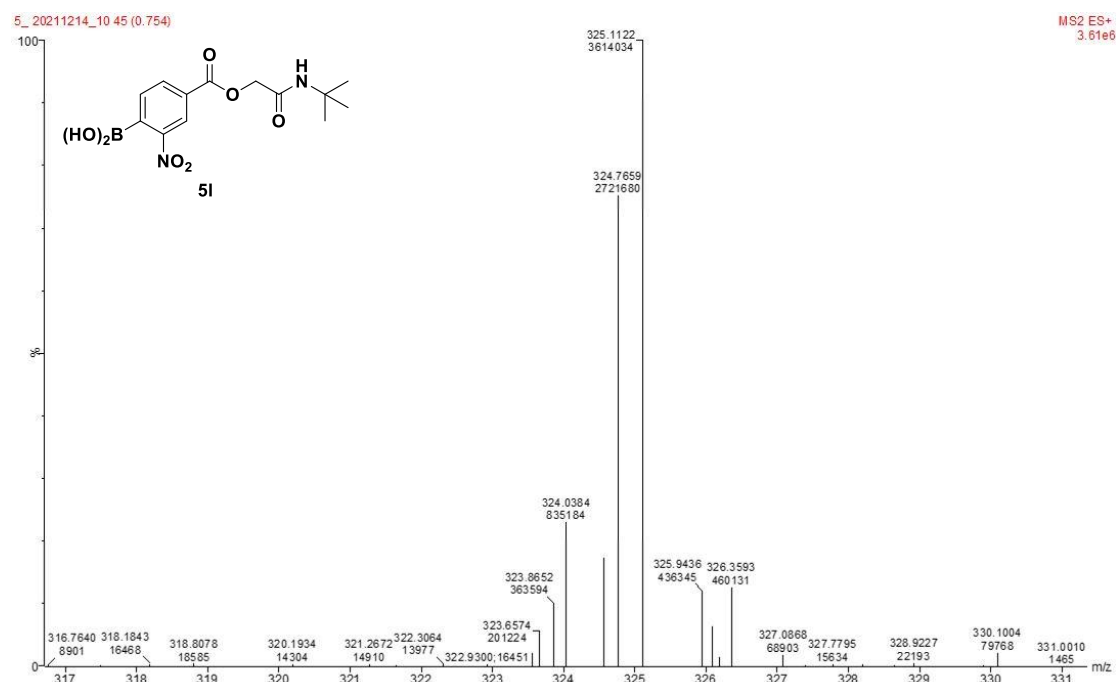

Figure S75. The HRMS (ESI<sup>+</sup>) of spectrum of 51

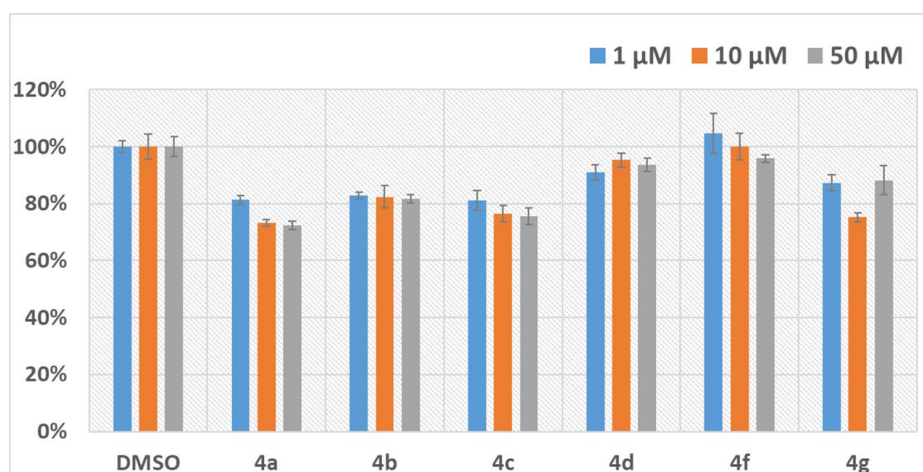

Figure S76. The cytotoxicity of the compounds **4a-4d**, **4f** and **4g** in HEK-293 cells.

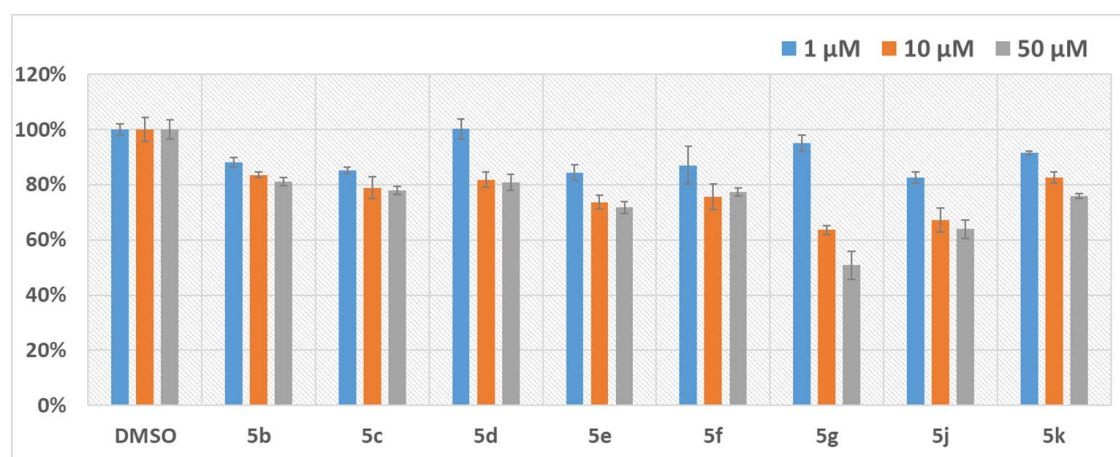

Figure S77. The cytotoxicity of the compounds **5b-5g**, **5j** and **5k** in HEK-293 cells.
